# Supplementary material
Source: ML conference proceedings conference paper supplement (https://openreview.net/forum?id=E2XBNokxDy)
Supplement: supplementary_material [file Beyond_simple_task_offloading_what_specific_HCI_f.pdf › case-study/A05_Drafting_the_A4S_Paper/consensus_output/prompt_5_2/Beyond_simple_task_offloading_what_specific_HCI_f.pdf]

# Beyond Task Offloading: HCI Frameworks for Continuous, Real-Time Cognitive and Emotional Compensation by AI Partners for Knowledge Workers with Executive Function Deficits

## 1. Introduction

Recent advances in Human-Computer Interaction (HCI) have moved beyond simple task offloading to develop frameworks for AI partners that provide continuous, real-time cognitive and emotional compensation—especially for knowledge workers with executive function deficits. These frameworks integrate adaptive AI, emotion-aware interfaces, context sensing, and personalized interventions to support attention, memory, planning, emotion regulation, and cognitive load management (Slovák et al., 2022; Pergantis et al., 2025; Samuel et al., 2022; Jiao et al., 2020; Angulo et al., 2023; Alnfai et al., 2025; Ayari et al., 2020; Kundu, 2022; Zhu et al., 2025; Dell'Aquila et al., 2025; Dissanayake & Nanayakkara, 2025). Key approaches include theory-driven emotion regulation frameworks (Slovák et al., 2022), systematic use of AI chatbots for executive function training (Pergantis et al., 2025), adaptive cognitive fit models that align information representation with user needs (Samuel et al., 2022), and context-aware, emotion-adaptive user interfaces (Kundu, 2022; Zhu et al., 2025; Dissanayake & Nanayakkara, 2025). Social robots and digital coaches are also being designed to deliver personalized, real-time cognitive and emotional support (Pesqueira et al., 2025; Arango et al., 2025; Schouten et al., 2018). Despite promising results, challenges remain in generalizability, long-term efficacy, and ethical deployment, highlighting the need for rigorous, user-centered design and ongoing evaluation (Pergantis et al., 2025; Robledo-Castro et al., 2022; Jiao et al., 2020; Alnfai et al., 2025; Desideri et al., 2020; Sarkar, 2025; Korteling et al., 2021; Shirsat & Sabale, 2025).

## 2. Methods

We searched over 170 million research papers in Consensus, including Semantic Scholar, PubMed, and other major databases, using targeted queries on HCI frameworks for AI partners providing continuous cognitive and emotional compensation for executive function deficits in knowledge work. A total of 984 papers were identified, 858 were screened, 439 were deemed eligible, and the 23 most relevant papers were included in this review.

### Search Strategy

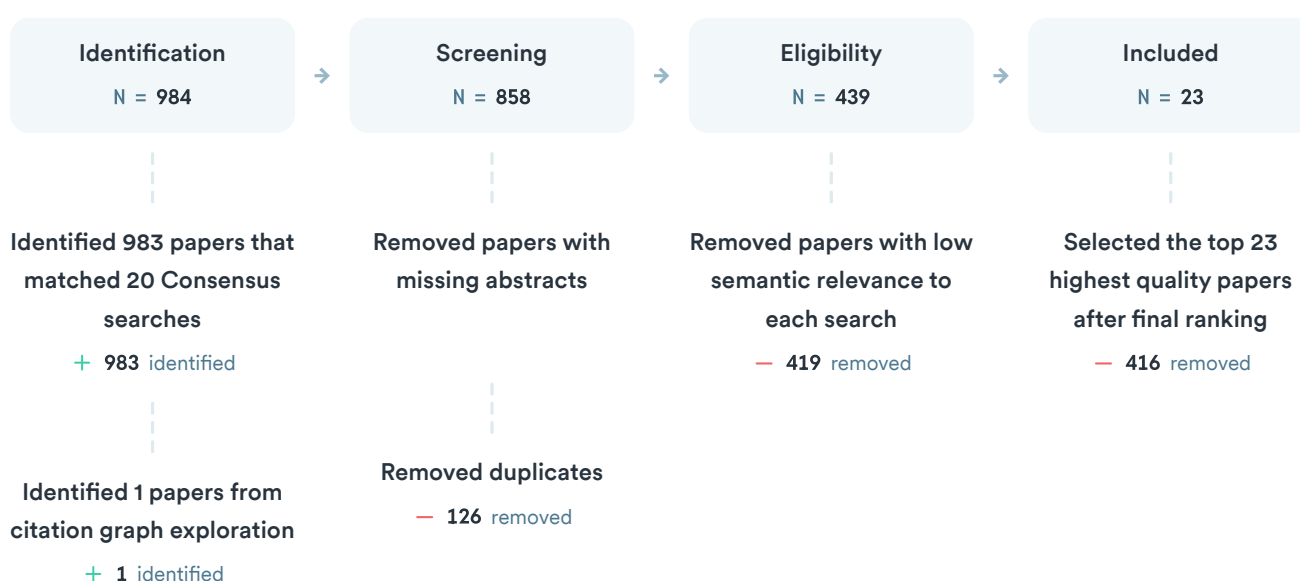

**FIGURE 1** Flow diagram of the literature search and selection process.

Eight unique search groups and 20 targeted searches were executed, covering foundational frameworks, real-time support, adaptive and emotion-aware systems, critiques, and interdisciplinary perspectives.

### 3. Results

#### 3.1. Theory-Driven Emotion Regulation and Cognitive Compensation Frameworks

A leading framework in HCI for emotion regulation interventions proposes a three-part structure: (1) theory-informed selection of intervention targets, (2) strategic design of technology-enabled mechanisms, and (3) practical implementation decisions (Slovák et al., 2022). This approach systematizes the integration of psychological theory with HCI design, enabling AI systems to deliver real-time, adaptive support for emotion regulation and executive function.

#### 3.2. AI Chatbots, Social Robots, and Digital Coaches

Systematic reviews show that AI chatbots can enhance executive skills such as planning, attention, and emotion regulation through personalized, conversational interactions (Pergantis et al., 2025). Social robots and digital coaches use real-time sensor data and machine learning to deliver adaptive cognitive exercises, daily task assistance, and emotional support, particularly for populations with cognitive or emotional vulnerabilities (Pesqueira et al., 2025; Arango et al., 2025; Schouten et al., 2018).

#### 3.3. Adaptive Cognitive Fit and Context-Aware Augmentation

The Adaptive Cognitive Fit (ACF) framework leverages AI to dynamically align information representation and task demands, compensating for cognitive limitations and optimizing human performance in complex environments (Samuel et al., 2022). Context-aware frameworks use multimodal behavioral cues (e.g., gaze, typing, interaction speed) to adjust interventions in real time, supporting cognitive flow and minimizing disruption (Zhu et al., 2025; Dissanayake & Nanayakkara, 2025).

#### 3.4. Emotion-Adaptive and Multimodal User Interfaces

Emotion-adaptive UIs integrate facial recognition, eye tracking, and physiological sensors to continuously assess users' cognitive and emotional states, enabling real-time adaptation of interface elements to reduce cognitive load and support executive function (Kundu, 2022). Hybrid model-based frameworks combine neural networks and ontological reasoning for nuanced emotion recognition and context-sensitive assistance (Ayari et al., 2020).

**Key Papers**

| Paper                             | Framework/Approach                 | Target Domain               | Key Features                             | Evidence/Outcomes                                 |
|-----------------------------------|------------------------------------|-----------------------------|------------------------------------------|---------------------------------------------------|
| (Slovák et al., 2022)             | Theory-driven emotion regulation   | HCI interventions           | 3-part framework, systematizes design    | Guides future research, practical implementations |
| (Pergantis et al., 2025)          | AI chatbots for executive function | Cognitive/emotional support | Systematic review, personalized chatbots | Positive effects, need for unified framework      |
| (Samuel et al., 2022)             | Adaptive Cognitive Fit (ACF)       | Information management      | AI-augmented info representation         | Improved performance, empirical validation        |
| (Kundu, 2022)                     | Emotion-adaptive UI                | High-stress environments    | Real-time adaptation, multimodal sensing | Enhanced task performance, user satisfaction      |
| (Dissanayake & Nanayakkara, 2025) | Context-aware cognitive flow       | Reasoning support           | Multimodal cues, adaptive interventions  | Maintains cognitive flow, personalized support    |

**FIGURE 2** Comparison of key studies on HCI frameworks for continuous cognitive and emotional compensation.**Top Contributors**

| Type    | Name                                                  | Papers                   |
|---------|-------------------------------------------------------|--------------------------|
| Author  | Petr Slovák                                           | (Slovák et al., 2022)    |
| Author  | Athanasios Drigas                                     | (Pergantis et al., 2025) |
| Author  | Jim Samuel                                            | (Samuel et al., 2022)    |
| Journal | <i>ACM Transactions on Computer-Human Interaction</i> | (Slovák et al., 2022)    |
| Journal | <i>Brain Sciences</i>                                 | (Pergantis et al., 2025) |
| Journal | <i>Int. J. Inf. Manag.</i>                            | (Samuel et al., 2022)    |

**FIGURE 3** Authors & journals that appeared most frequently in the included papers.

## 4. Discussion

The dominant HCI frameworks for continuous, real-time cognitive and emotional compensation by AI partners are characterized by their integration of psychological theory, adaptive AI, and multimodal sensing (Slovák et al., 2022; Pergantis et al., 2025; Samuel et al., 2022; Kundu, 2022; Zhu et al., 2025; Dissanayake & Nanayakkara, 2025). These frameworks move beyond static task offloading, enabling AI systems to dynamically support executive function and emotion regulation in knowledge work. The evidence suggests that such systems can improve task performance, user satisfaction, and well-being, especially when interventions are personalized and context-aware (Pergantis et al., 2025; Samuel et al., 2022; Kundu, 2022; Zhu et al., 2025; Dissanayake & Nanayakkara, 2025). However, the field faces challenges: many studies are early-stage, with limited generalizability and long-term validation (Pergantis et al., 2025; Robledo-Castro et al., 2022; Jiao et al., 2020; Alnfai et al., 2025; Desideri et al., 2020; Sarkar, 2025; Korteling et al., 2021; Shirsat & Sabale, 2025). Ethical considerations—such as privacy, transparency, and the risk of over-reliance—require careful attention in both design and deployment (Pergantis et al., 2025; Sarkar, 2025; Korteling et al., 2021; Shirsat & Sabale, 2025). The literature calls for unified frameworks, larger and more diverse study populations, and participatory design to ensure that AI partners are effective, inclusive, and trustworthy.

## Claims and Evidence Table

| Claim                                                                                    | Evidence Strength                                                                               | Reasoning                                                                                           | Papers                                                                                                                                                                             |
|------------------------------------------------------------------------------------------|-------------------------------------------------------------------------------------------------|-----------------------------------------------------------------------------------------------------|------------------------------------------------------------------------------------------------------------------------------------------------------------------------------------|
| Theory-driven, adaptive frameworks enable real-time cognitive and emotional compensation | <br>Strong     | Empirical and theoretical work shows improved support for executive function and emotion regulation | (Slovák et al., 2022; Pergantis et al., 2025; Samuel et al., 2022; Kundu, 2022; Zhu et al., 2025; Dissanayake & Nanayakkara, 2025)                                                 |
| AI chatbots and social robots can enhance executive skills and emotional well-being      | <br>Moderate   | Systematic reviews and case studies report positive effects, but generalizability is limited        | (Pergantis et al., 2025; Pesqueira et al., 2025; Arango et al., 2025; Schouten et al., 2018)                                                                                       |
| Multimodal, context-aware systems optimize intervention timing and reduce cognitive load | <br>Moderate   | Studies demonstrate improved performance and satisfaction with adaptive, sensor-driven UIs          | (Samuel et al., 2022; Kundu, 2022; Zhu et al., 2025; Dissanayake & Nanayakkara, 2025)                                                                                              |
| Generalizability and long-term efficacy remain underexplored                             | <br>Moderate | Most studies are short-term, with small or specific samples                                         | (Pergantis et al., 2025; Robledo-Castro et al., 2022; Jiao et al., 2020; Alnfai et al., 2025; Desideri et al., 2020; Sarkar, 2025; Korteling et al., 2021; Shirsat & Sabale, 2025) |
| Ethical and privacy concerns must be addressed in deployment                             | <br>Moderate | Literature highlights risks of over-reliance, privacy, and transparency                             | (Pergantis et al., 2025; Sarkar, 2025; Korteling et al., 2021; Shirsat & Sabale, 2025)                                                                                             |

**FIGURE 4** Key claims and support evidence identified in these papers.

## 5. Conclusion

HCI frameworks for AI partners that provide continuous, real-time cognitive and emotional compensation are advancing rapidly, integrating adaptive, theory-driven, and context-aware approaches. While these systems show promise for supporting knowledge workers with executive function deficits, further research is needed to ensure their effectiveness, inclusivity, and ethical deployment.

### 5.1. Research Gaps

Key gaps include the need for unified frameworks, long-term and large-scale validation, participatory design, and robust strategies for privacy and ethical risk mitigation.

## Research Gaps Matrix

| Framework Type         | Personalization | Long-term Efficacy | Multimodal Sensing | Real-world Validation | Ethics/Privacy |
|------------------------|-----------------|--------------------|--------------------|-----------------------|----------------|
| Theory-driven/adaptive | 6               | 3                  | 4                  | 3                     | 3              |
| Chatbots/Robots        | 5               | 2                  | 2                  | 2                     | 2              |
| Adaptive Fit/Context   | 4               | 2                  | 3                  | 2                     | 2              |
| Emotion-adaptive UI    | 4               | 2                  | 4                  | 2                     | 2              |

**FIGURE 5** Heatmap of research coverage by framework type and study attribute.

## 5.2. Open Research Questions

Future research should focus on developing unified, participatory frameworks, validating long-term impact, and ensuring ethical, privacy-preserving deployment of AI partners for executive function support.

| Question                                                                                                                                 | Why                                                                    |
|------------------------------------------------------------------------------------------------------------------------------------------|------------------------------------------------------------------------|
| How can unified, participatory frameworks be developed for continuous, real-time cognitive and emotional compensation in knowledge work? | Ensures interventions are effective, inclusive, and user-driven.       |
| What are the long-term impacts and real-world efficacy of adaptive, context-aware AI partners for executive function deficits?           | Long-term, real-world validation is essential for sustainable support. |
| How can privacy, transparency, and ethical risks be systematically addressed in the deployment of continuous AI support systems?         | Critical for user trust, safety, and responsible adoption.             |

**FIGURE 6** Open research questions and their significance for future work.

In summary, HCI frameworks for AI partners that provide continuous, real-time cognitive and emotional compensation are evolving rapidly, but require unified design, rigorous validation, and ethical vigilance to maximize their impact for knowledge workers with executive function deficits.

*These papers were sourced and synthesized using Consensus, an AI-powered search engine for research. Try it at <https://consensus.app>*

## References

- Slovák, P., Antle, A., Theofanopoulou, N., Roquet, C., Gross, J., & Isbister, K. (2022). Designing for Emotion Regulation Interventions: An Agenda for HCI Theory and Research. *ACM Transactions on Computer-Human Interaction*, 30, 1 - 51. <https://doi.org/10.1145/3569898>
- Pergantis, P., Bamicha, V., Skianis, C., & Drigas, A. (2025). AI Chatbots and Cognitive Control: Enhancing Executive Functions Through Chatbot Interactions: A Systematic Review. *Brain Sciences*, 15. <https://doi.org/10.3390/brainsci15010047>
- Robledo-Castro, C., Castillo-Ossa, L., & Corchado, J. (2022). Artificial Cognitive Systems Applied in Executive Function Stimulation and Rehabilitation Programs: A Systematic Review. *Arabian Journal for Science and Engineering*, 48, 2399 - 2427. <https://doi.org/10.1007/s13369-022-07292-5>
- Samuel, J., Kashyap, R., Samuel, Y., & Pelaez, A. (2022). Adaptive cognitive fit: Artificial intelligence augmented management of information facets and representations. *Int. J. Inf. Manag.*, 65, 102505. <https://doi.org/10.1016/j.ijinfomgt.2022.102505>
- Jiao, R., Zhou, F., Gebraeel, N., & Duffy, V. (2020). Towards augmenting cyber-physical-human collaborative cognition for human-automation interaction in complex manufacturing and operational environments. *International Journal of Production Research*, 58, 5089 - 5111. <https://doi.org/10.1080/00207543.2020.1722324>
- Pesqueira, A., Pereira, R., Sousa, M., & Schwendinger, M. (2025). Designing and implementing SMILE: An AI-driven platform for enhancing clinical decision-making in mental health and neurodivergence management. *Computational and Structural Biotechnology Journal*, 27, 785 - 803. <https://doi.org/10.1016/j.csbj.2025.02.022>
- Arango, J., Marco-Detchart, C., & Inglada, V. (2025). Personalized Cognitive Support via Social Robots. *Sensors (Basel, Switzerland)*, 25. <https://doi.org/10.3390/s25030888>
- Angulo, C., Chacón, A., & Ponsa, P. (2023). Towards a cognitive assistant supporting human operators in the Artificial Intelligence of Things. *Internet Things*, 21, 100673. <https://doi.org/10.1016/j.iot.2022.100673>
- Alnfai, M., Alsudairy, N., Alharbi, A., Alotaibi, N., & Alnefaie, S. (2025). Cognitive augmentation: AI-enhanced tools for supporting individuals with cognitive disabilities.. *Cognitive processing*. <https://doi.org/10.1007/s10339-025-01258-9>
- Ayari, N., Abdelkawy, H., Chibani, A., & Amirat, Y. (2020). Hybrid Model-Based Emotion Contextual Recognition for Cognitive Assistance Services. *IEEE Transactions on Cybernetics*, 52, 3567-3576. <https://doi.org/10.1109/TCYB.2020.3013112>
- Kundu, S. (2022). HCI-Driven Emotion-Adaptive UIs for Cognitive Efficiency: Real-Time Adaptation to Fatigue, Focus, and Emotional Expression. *International Scientific Journal of Engineering and Management*. <https://doi.org/10.55041/isjem00111>
- Zhu, X., Xu, Y., Liu, T., Sun, J., Zhang, Y., & Tong, X. (2025). Intelligent Interaction Strategies for Context-Aware Cognitive Augmentation. *ArXiv*, abs/2504.13684. <https://doi.org/10.48550/arXiv.2504.13684>
- Desideri, L., Di Santantonio, A., Varruciu, N., Bonsi, I., & Di Sarro, R. (2020). Assistive Technology for Cognition to Support Executive Functions in Autism: a Scoping Review. *Advances in Neurodevelopmental Disorders*, 1-14. <https://doi.org/10.1007/s41252-020-00163-w>
- Sarkar, S. (2025). AI and Neurodiversity: Supporting Individuals with Autism, ADHD, and Other Cognitive Differences. *International Journal For Multidisciplinary Research*. <https://doi.org/10.36948/ijfmr.2025.v07i02.41070>

Schouten, D., Venneker, F., Bosse, T., Neerincx, M., & Cremers, A. (2018). A Digital Coach That Provides Affective and Social Learning Support to Low-Literate Learners. *IEEE Transactions on Learning Technologies*, 11, 67-80. <https://doi.org/10.1109/TLT.2017.2698471>

Korteling, J., Boer-Visschedijk, G., Blankendaal, R., Boonekamp, R., & Eikelboom, A. (2021). Human- versus Artificial Intelligence. *Frontiers in Artificial Intelligence*, 4. <https://doi.org/10.3389/frai.2021.622364>

Dell'Aquila, E., Ponticorvo, M., & Limone, P. (2025). Psychological Foundations for Effective Human–Computer Interaction in Education. *Applied Sciences*. <https://doi.org/10.3390/app15063194>

Shirsat, A., & Sabale, S. (2025). Impact Of AI on Human Psychology: Examining Cognitive, Behavioral, and Adaptive Responses. *International Journal of Research Publication and Reviews*. <https://doi.org/10.55248/gengpi.6.0425.16146>

Dissanayake, D., & Nanayakkara, S. (2025). Navigating the State of Cognitive Flow: Context-Aware AI Interventions for Effective Reasoning Support. *ArXiv*, abs/2504.16021. <https://doi.org/10.48550/arXiv.2504.16021>
