# Supplementary material
Source: ML conference proceedings conference paper supplement (https://openreview.net/forum?id=E2XBNokxDy)
Supplement: supplementary_material [file How to Use Deep Search _ The Consensus Help Center.pdf › case-study/A05_Drafting_the_A4S_Paper/context/How to Use Deep Search _ The Consensus Help Center.pdf]

 Search for articles...[All Collections](#) > [Explore features](#) > [How to Use Deep Search](#)

# How to Use Deep Search

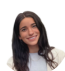

Written by Allison Elechko

Updated over a week ago

Table of contents

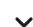

**Deep Search** is a powerful research agent that conducts full literature reviews across 220 million academic papers in just minutes. It helps you critically explore a topic, identify major findings, surface counterpoints, and get a structured understanding of the field.

## Introducing Deep Search

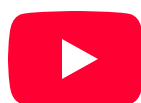

## How does Deep Search work?

It works just how a researcher approaches a topic! Deep search breaks down your question into multiple sub-questions, runs up to 20 unique targeted searches, and synthesizes a detailed literature review of the top findings. Here's what happens behind the scenes:

1. **Breaks down your question** into multiple sub-questions
2. **Runs up to 20 targeted searches** related to your topic
3. **Reviews over 1,000 papers** to select the most relevant ones
4. **Synthesizes a structured literature review** based on the top ~50 papers

The report follows the structure of a traditional literature review complete with **introduction, methods, results, and discussion**. It also includes interactive visuals that:

- Show the consensus among the research
- Highlight key authors
- Extract key claims and their supporting evidence
- Reveal potential research gaps

The screenshot displays the Deep Search interface for the query "Is poor sleep associated with greater dementia risk?". The interface is divided into two main sections. The left section shows a blurred preview of the resulting literature review. The right section provides a detailed breakdown of the search process:

- Deep Search** (Is poor sleep associated with greater dementia risk?)
- 494** Identified
- 467** Screened
- 412** Eligible
- Included

The search process is detailed in a list of steps, each with a checkmark and a dropdown arrow:

- Initial Survey**: 1 search · 50 eligible papers
- Clarified Sleep Constructs**: 3 searches · 90 eligible papers
- Rephrased for Synonyms**: 3 searches · 71 eligible papers
- Identifying Contrasting Evidence**:
  - Reverse causality and bi-directional relationships between sleep disturbance and dementia
  - Methodological limitations in studies linking sleep and dementia risk
  - Sleep changes as early markers rather than causes of dementia

At the bottom, a note states: "Target literature reporting null, negative, or complex/bi-directional associations between sleep and dementia, as well as..."

## How to run a Deep Search

1. Start a new search [here](#)
2. **Toggle on Deep** mode using the search mode dropdown
3. Enter your question and submit your search
4. Wait a few minutes while Deep Search conducts and synthesizes results

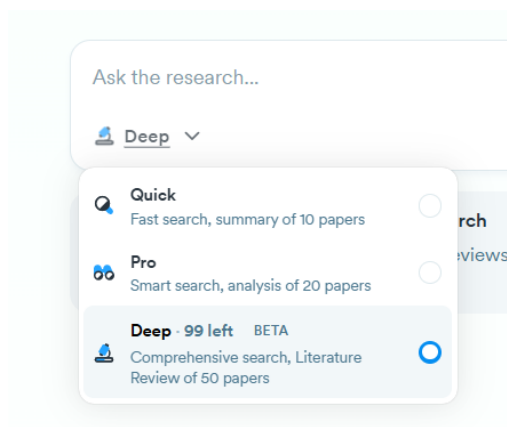

## How to copy or export the Deep Search report

Use the Export button to download or copy/paste your analysis into Word, Docs, Notion, or Obsidian, with tables, charts, citations, and headings all preserved.

1. Submit a query with **Deep** mode
2. Scroll to the bottom of the report
3. Click **Export**
4. Select '**Copy text**', '**Copy with citations**', or '**Export as PDF**' depending on your needs

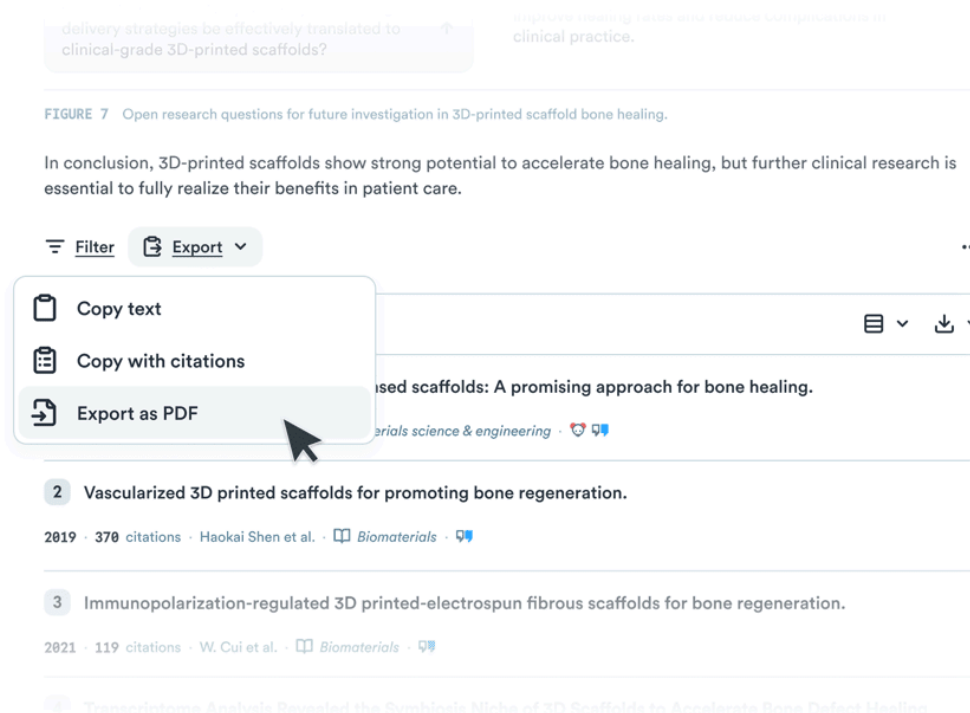

## Example Searches

-  Compare permissive & authoritative parenting styles
-  Does the MMR vaccine cause autism?
-  Is poor sleep associated with greater dementia risk?

## Deep Search Availability

Deep Search is available to all users during our beta period:

- **Free Plan:** 3 Deep Searches per month
- **Premium Plan:** 100 Deep Searches per month

Note: Limits may change after the beta period.

Still need assistance? Contact us at [support@consensus.app](mailto:support@consensus.app) or via the Support Chat.

## Related Articles

How to Search & Best Practices

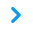

How Consensus Works

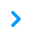

Consensus Guide: How to Write a Literature Review or Dissertation

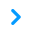

How to Use Pro Analysis

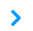

Literature Review

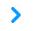

Did this answer your question?

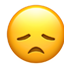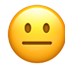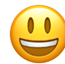

## The Consensus Help Center

Our mission is to democratize access to the world's best knowledge.

[Back to Search](#)

[Universities & Students](#)

[Doctors & Clinicians](#)

[Science Content](#)

[Ambassador Program](#)

[Contact](#)
