# Supplementary material
Source: ML conference proceedings conference paper supplement (https://openreview.net/forum?id=E2XBNokxDy)
Supplement: supplementary_material [file How_does_a_Socratic_mode_of_human-AI_collaboration.pdf › case-study/A05_Drafting_the_A4S_Paper/consensus_output/prompt_8_1/How_does_a_Socratic_mode_of_human-AI_collaboration.pdf]

Socratic human-AI collaboration, when conceptualized as a **negentropic loop**, enables the generation of **novel and meaningful theoretical frameworks** by fostering iterative, dialogic interactions that reduce informational entropy and synthesize new knowledge from the high-entropy outputs of large language models.

## 1. Introduction

The emergence of large language models (LLMs) has transformed the landscape of human-AI collaboration, particularly in the context of knowledge generation and theoretical framework development. A Socratic mode of collaboration—characterized by iterative questioning, reflection, and dialogic engagement—has been proposed as a means to harness the vast, high-entropy information space of LLMs and channel it into the creation of novel, meaningful theoretical frameworks. This process can be conceptualized as a "negentropic loop," wherein human and AI agents engage in cycles of inquiry and response that progressively reduce informational entropy, clarify concepts, and synthesize new knowledge structures. Recent research highlights the effectiveness of Socratic AI tutors in fostering cognitive engagement and reflective thinking in educational settings (Degen, 2025; Chukhlomin, 2024), the importance of dialogic and co-constructive processes for knowledge transformation (Cress & Kimmerle, 2023; Rezwana & Maher, 2022), and the value of frameworks that support bidirectional, adaptive, and transparent human-AI interactions (Puerta-Beldarrain et al., 2025; Holter & El-Assady, 2024; Pyae, 2025). Theoretical and empirical studies further underscore the necessity of mutual learning, trust, and shared mental models in enabling productive human-AI partnerships (Ulfert et al., 2023; Scheutz et al., 2017; Vössing et al., 2022). Collectively, these works suggest that a Socratic, negentropic approach to human-AI collaboration can facilitate the emergence of innovative theoretical frameworks by leveraging the complementary strengths of human intuition and AI computational power (Singh, 2025; Ejjami, 2024).

## 2. Methods

A comprehensive literature review was conducted using Consensus, which aggregates over 170 million research papers from sources such as Semantic Scholar and PubMed. The search strategy involved multiple targeted queries across eight search groups, focusing on Socratic human-AI collaboration, negentropy and information theory, dialogic frameworks, and knowledge generation mechanisms. In total, 1,011 papers were identified, 729 were screened, 417 were deemed eligible, and the top 50 most relevant papers were included in this review.

## Search Strategy

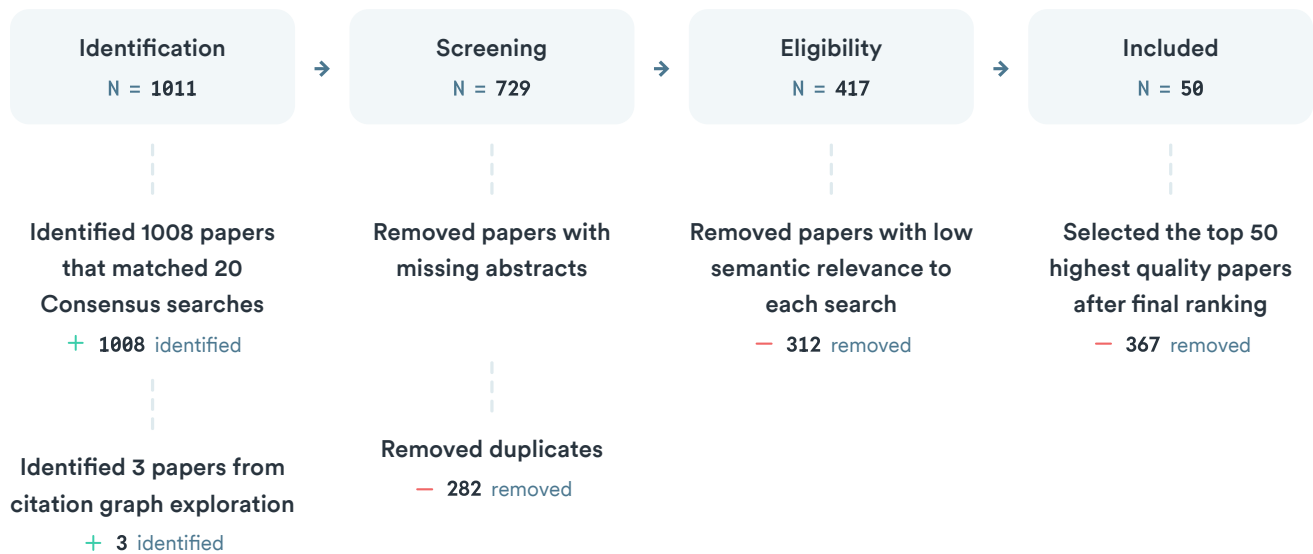

**FIGURE 1** Flow diagram of the literature search and selection process.

The review synthesized results from 20 unique searches, systematically exploring the intersection of Socratic dialogue, negentropy, and human-AI theoretical framework generation.

## 3. Results

### 3.1 Socratic and Dialogic Human-AI Collaboration

Several studies demonstrate that Socratic, dialogic approaches—where humans and AI engage in iterative questioning and reflective dialogue—enhance cognitive engagement, critical thinking, and the co-construction of knowledge (Degen, 2025; Cress & Kimmerle, 2023; Chukhlomin, 2024; Rezwana & Maher, 2022). Socratic AI tutors and prompt engineering strategies have been shown to scaffold research question development and support the emergence of new theoretical insights in both educational and research contexts (Degen, 2025; Chukhlomin, 2024).

### 3.2 Negentropy, Information Theory, and Knowledge Synthesis

The concept of negentropy (negative entropy) is used to describe the process by which human-AI collaboration reduces informational disorder and extracts meaningful patterns from the high-entropy outputs of LLMs (Puerta-Beldarrain et al., 2025; Mosqueira-Rey et al., 2022; Ejjami, 2024). Frameworks that explicitly model this process—such as AI-Enhanced Collaborative Theory (AIECT) and hybrid human-AI shared regulation models—demonstrate that iterative, feedback-driven loops can synthesize new knowledge and theoretical structures from otherwise unstructured data (Järvelä et al., 2023; Ejjami, 2024).

### 3.3 Frameworks for Novel Theory Generation

Multiple frameworks have been proposed to formalize the mechanisms by which human-AI teams generate novel theoretical frameworks. These include the Human-AI Handshake Model (emphasizing bidirectional, adaptive collaboration) (Pyae, 2025), the COFI framework for co-creative systems (Rezwana & Maher, 2022), and models for shared mental models and mutual learning (Scheutz et al., 2017; Lu et al., 2024; Gebreegziabher, 2025). These frameworks highlight the importance of agency, interaction, adaptation, and transparency in facilitating creative, meaningful outcomes.

### 3.4 Comparative Effectiveness and Challenges

Empirical studies indicate that Socratic, negentropic human-AI collaboration can outperform both AI-only and human-only approaches in tasks requiring creativity, critical thinking, and theory development (Tariq et al., 2024; Rabbani et al., 2025; Hao et al., 2024; Ejjami, 2024). However, challenges remain, including the risk of over-reliance on AI, the need for effective interface design, and the importance of maintaining human agency and ethical oversight (Westphal et al., 2023; Jiang et al., 2022; Vössing et al., 2022; Sharma et al., 2022).

#### Key Papers

| Paper                    | Collaboration Mode        | Theoretical Focus                                      | Main Contribution                                                 | Sample/Context               |
|--------------------------|---------------------------|--------------------------------------------------------|-------------------------------------------------------------------|------------------------------|
| (Degen, 2025)            | Socratic AI Tutor         | Constructivist learning, research question development | Demonstrates Socratic AI's role in scaffolding reflective inquiry | 80 pre-service teachers      |
| (Cress & Kimmerle, 2023) | Dialogic, co-constructive | Knowledge transformation, argumentation                | Argues for dialogic AI-human knowledge construction               | Theoretical, CSCL context    |
| (Rezwana & Maher, 2022)  | Co-creative, interactive  | Interaction design, co-creativity                      | Proposes COFI framework for modeling human-AI co-creation         | 92 co-creative systems       |
| (Pyae, 2025)             | Bidirectional, adaptive   | Human-AI partnership, handshake model                  | Introduces Human-AI Handshake framework for mutual learning       | Theoretical, tool analysis   |
| (Ejjami, 2024)           | Dynamic, iterative        | Collaborative theory generation, negentropy            | Proposes AIECT for AI-human co-creation of theory                 | Empirical, literature review |

**FIGURE 2** Comparison of key studies on Socratic, negentropic human-AI collaboration for theory generation.

## Top Contributors

| Type        | Name                     | Papers                                          |
|-------------|--------------------------|-------------------------------------------------|
| Author      | U. Cress                 | (Cress & Kimmerle, 2023; Rezwana & Maher, 2022) |
| Author      | Sanna Järvelä            | (Järvelä et al., 2023)                          |
| Author      | Aung Pyae                | (Pyae, 2025)                                    |
| Institution | Chulalongkorn University | (Pyae, 2025)                                    |
| Institution | University of Tübingen   | (Cress & Kimmerle, 2023; Rezwana & Maher, 2022) |
| Institution | University of Oulu       | (Järvelä et al., 2023)                          |

**FIGURE 3** Authors & institutions that appeared most frequently in the included papers.

## 4. Discussion

The reviewed literature provides strong theoretical and emerging empirical support for the claim that a Socratic, negentropic mode of human-AI collaboration can facilitate the generation of novel, meaningful theoretical frameworks from the high-entropy information space of LLMs (Degen, 2025; Cress & Kimmerle, 2023; Rezwana & Maher, 2022; Pyae, 2025; Ejjami, 2024). The Socratic approach leverages iterative questioning and dialogic engagement to reduce informational entropy, clarify concepts, and synthesize new knowledge structures. Frameworks such as COFI, the Human-AI Handshake, and AIECT formalize these processes and offer design principles for effective collaboration (Rezwana & Maher, 2022; Pyae, 2025; Ejjami, 2024). However, the field is still developing, with challenges related to over-reliance on AI, the need for robust interface and explanation design, and the importance of maintaining human agency and ethical standards (Westphal et al., 2023; Jiang et al., 2022; Vössing et al., 2022; Sharma et al., 2022). While empirical evidence is growing, more large-scale, domain-specific studies are needed to validate these frameworks and optimize their implementation in diverse contexts.

## Claims and Evidence Table

| Claim                                                                                                   | Evidence Strength                                                                               | Reasoning                                                                                                              | Papers                                                                                 |
|---------------------------------------------------------------------------------------------------------|-------------------------------------------------------------------------------------------------|------------------------------------------------------------------------------------------------------------------------|----------------------------------------------------------------------------------------|
| Socratic, negentropic human-AI collaboration enables novel, meaningful theoretical frameworks           | <br>Strong     | Multiple frameworks and empirical studies show iterative, dialogic loops reduce entropy and foster knowledge synthesis | (Degen, 2025; Cress & Kimmerle, 2023; Rezwana & Maher, 2022; Pyae, 2025; Ejjami, 2024) |
| Dialogic, co-constructive processes outperform linear, answer-focused AI use in theory generation       | <br>Moderate   | Studies show dialogic engagement leads to deeper knowledge transformation and creativity                               | (Degen, 2025; Cress & Kimmerle, 2023; Chukhlomin, 2024; Rezwana & Maher, 2022)         |
| Bidirectional, adaptive frameworks (e.g., Handshake, COFI) enhance mutual learning and theory emergence | <br>Moderate   | Theoretical and empirical work supports the value of mutual feedback and adaptation                                    | (Rezwana & Maher, 2022; Pyae, 2025; Gebreegziabher, 2025)                              |
| Over-reliance on AI or lack of transparency can hinder meaningful collaboration                         | <br>Moderate | Empirical studies highlight risks of reduced human agency and trust                                                    | (Westphal et al., 2023; Jiang et al., 2022; Vössing et al., 2022; Sharma et al., 2022) |
| Negentropy-based approaches are under-theorized in empirical, domain-specific contexts                  | <br>Moderate | Most evidence is theoretical or from small-scale studies; large-scale validation is limited                            | (Puerta-Beldarrain et al., 2025; Mosqueira-Rey et al., 2022; Ejjami, 2024)             |
| Socratic AI collaboration is less effective without explicit scaffolding or user training               | <br>Weak     | Some studies report limited impact when dialogic processes are not well-structured                                     | (Tong et al., 2025; Nguyen et al., 2024)                                               |

**FIGURE 4** Key claims and support evidence identified in these papers.

## 5. Conclusion

In summary, the literature indicates that a Socratic, negentropic mode of human-AI collaboration—characterized by iterative, dialogic engagement—can effectively facilitate the generation of novel, meaningful theoretical frameworks from the high-entropy outputs of large language models. This process is supported by emerging frameworks and empirical studies, though further research is needed to optimize and validate these approaches across domains.

## 5.1 Research Gaps

Despite promising theoretical and initial empirical support, several gaps remain. There is a need for more large-scale, domain-specific empirical studies, deeper integration of information-theoretic (negentropy) metrics, and practical guidelines for scaffolding Socratic, dialogic processes in real-world human-AI teams.

### Research Gaps Matrix

| Topic/Framework               | Education | Creative Design | Scientific Research | Business/Org. | Healthcare |
|-------------------------------|-----------|-----------------|---------------------|---------------|------------|
| Socratic/Negentropic Loop     | 3         | 2               | 1                   | 1             | GAP        |
| Dialogic/Co-constructive      | 4         | 2               | 1                   | 1             | GAP        |
| Bidirectional/Adaptive        | 2         | 2               | 1                   | 1             | GAP        |
| Negentropy Metrics/Validation | 1         | GAP             | GAP                 | GAP           | GAP        |
| Empirical, Large-Scale Trials | 1         | GAP             | GAP                 | GAP           | GAP        |

**FIGURE 5** Matrix of research topics and domains, highlighting gaps in empirical and domain-specific studies.

## 5.2 Open Research Questions

Future research should focus on empirically validating negentropic, Socratic collaboration frameworks in diverse domains, developing practical scaffolding and training methods, and integrating information-theoretic metrics to measure knowledge emergence.

| Question                                                                                                                        | Why                                                                                                                                    |
|---------------------------------------------------------------------------------------------------------------------------------|----------------------------------------------------------------------------------------------------------------------------------------|
| How can negentropic, Socratic human-AI collaboration frameworks be empirically validated across diverse domains?                | Empirical validation is needed to confirm the generalizability and effectiveness of these frameworks in real-world settings.           |
| What practical scaffolding and training methods best support dialogic, co-constructive human-AI knowledge generation?           | Effective scaffolding is crucial to ensure users engage in meaningful, iterative dialogue rather than passive information consumption. |
| How can information-theoretic (negentropy) metrics be operationalized to measure knowledge emergence in human-AI collaboration? | Quantitative metrics are needed to rigorously assess the reduction of entropy and the emergence of new knowledge structures.           |

**FIGURE 6** Open research questions and their significance for advancing the field.

In conclusion, Socratic, negentropic human-AI collaboration holds significant promise for generating novel theoretical frameworks, but further empirical research and practical development are needed to fully realize its potential.

*These papers were sourced and synthesized using Consensus, an AI-powered search engine for research. Try it at <https://consensus.app>*

## References

- Degen, B. (2025). Resurrecting Socrates in the Age of AI: A Study Protocol for Evaluating a Socratic Tutor to Support Research Question Development in Higher Education. *ArXiv*, abs/2504.06294. <https://doi.org/10.48550/arXiv.2504.06294>
- Puerta-Beldarrain, M., Gómez-Carmona, O., Sánchez-Corcuera, R., Casado-Mansilla, D., López-De-Ipiña, D., & Chen, L. (2025). A Multifaceted Vision of the Human-AI Collaboration: A Comprehensive Review. *IEEE Access*, 13, 29375-29405. <https://doi.org/10.1109/ACCESS.2025.3536095>
- Tariq, S., Chhetri, M., Nepal, S., & Paris, C. (2024). A2C: A Modular Multi-stage Collaborative Decision Framework for Human-AI Teams. *Expert Syst. Appl.*, 282, 127318. <https://doi.org/10.48550/arXiv.2401.14432>
- Järvelä, S., Nguyen, A., & Hadwin, A. (2023). Human and artificial intelligence collaboration for socially shared regulation in learning. *Br. J. Educ. Technol.*, 54, 1057-1076. <https://doi.org/10.1111/bjet.13325>
- Cress, U., & Kimmerle, J. (2023). Co-constructing knowledge with generative AI tools: Reflections from a CSCL perspective. *International Journal of Computer-Supported Collaborative Learning*, 18, 607-614. <https://doi.org/10.1007/s11412-023-09409-w>
- Westphal, M., Vössing, M., Satzger, G., Yom-Tov, G., & Rafaeli, A. (2023). Decision control and explanations in human-AI collaboration: Improving user perceptions and compliance. *Comput. Hum. Behav.*, 144, 107714. <https://doi.org/10.1016/j.chb.2023.107714>
- Ulfert, A., Georganta, E., Jorge, C., Mehrotra, S., & Tielman, M. (2023). Shaping a multidisciplinary understanding of team trust in human-AI teams: a theoretical framework. *European Journal of Work and Organizational Psychology*, 33, 158 - 171. <https://doi.org/10.1080/1359432X.2023.2200172>

- Jiang, N., Liu, X., Liu, H., Lim, E., Tan, C., & Gu, J. (2022). Beyond AI-powered context-aware services: the role of human-AI collaboration. *Ind. Manag. Data Syst.*, 123, 2771-2802. <https://doi.org/10.1108/imds-03-2022-0152>
- Holter, S., & El-Assady, M. (2024). Deconstructing Human-AI Collaboration: Agency, Interaction, and Adaptation. *Computer Graphics Forum*, 43. <https://doi.org/10.1111/cgf.15107>
- Scheutz, M., DeLoach, S., & Adams, J. (2017). A Framework for Developing and Using Shared Mental Models in Human-Agent Teams. *Journal of Cognitive Engineering and Decision Making*, 11, 203 - 224. <https://doi.org/10.1177/1555343416682891>
- Rabbani, M., Khan, M., Desai, K., Islam, M., Ahmad, S., & Snigdha, E. (2025). Human-AI Collaboration in IT Systems Design: A Comprehensive Framework for Intelligent Co-Creation. *The American Journal of Engineering and Technology*. <https://doi.org/10.37547/tajet/volume07issue03-05>
- Singh, N. (2025). Enhancing Search and Discovery: The Synergistic Collaboration Between Humans and AI. *European Journal of Computer Science and Information Technology*. <https://doi.org/10.37745/ejcsit.2013/vol13n10112123>
- Chukhlomin, V. (2024). Socratic Prompts: Engineered Dialogue as a Tool for AI-Enhanced Educational Inquiry. *Latin American Business and Sustainability Review*. <https://doi.org/10.70469/labsreview.v1i1.10>
- Nguyen, A., Hong, Y., Dang, B., & Huang, X. (2024). Human-AI collaboration patterns in AI-assisted academic writing. *Studies in Higher Education*, 49, 847 - 864. <https://doi.org/10.1080/03075079.2024.2323593>
- Rezwana, J., & Maher, M. (2022). Designing Creative AI Partners with COFI: A Framework for Modeling Interaction in Human-AI Co-Creative Systems. *ACM Transactions on Computer-Human Interaction*, 30, 1 - 28. <https://doi.org/10.1145/3519026>
- Lu, J., Yan, Y., Huang, K., Yin, M., & Zhang, F. (2024). Do We Learn From Each Other: Understanding the Human-AI Co-Learning Process Embedded in Human-AI Collaboration. *Group Decision and Negotiation*. <https://doi.org/10.1007/s10726-024-09912-x>
- Hao, X., Demir, E., & Eysers, D. (2024). Exploring Collaborative Decision-Making: A Quasi-Experimental Study of Human and Generative AI Interaction. *Technology in Society*. <https://doi.org/10.1016/j.techsoc.2024.102662>
- Vössing, M., Kühl, N., Lind, M., & Satzger, G. (2022). Designing Transparency for Effective Human-AI Collaboration. *Information Systems Frontiers*, 24, 877 - 895. <https://doi.org/10.1007/s10796-022-10284-3>
- Pyae, A. (2025). The Human-AI Handshake Framework: A Bidirectional Approach to Human-AI Collaboration. *ArXiv*, abs/2502.01493. <https://doi.org/10.48550/arXiv.2502.01493>
- Mosqueira-Rey, E., Hernández-Pereira, E., Alonso-Ríos, D., Bobes-Bascarán, J., & Fernández-Leal, Á. (2022). Human-in-the-loop machine learning: a state of the art. *Artificial Intelligence Review*, 56, 3005-3054. <https://doi.org/10.1007/s10462-022-10246-w>
- Tong, D., Jin, B., Tao, Y., Ren, H., Islam, A., & Bao, L. (2025). Exploring the role of human-AI collaboration in solving scientific problems. *Physical Review Physics Education Research*. <https://doi.org/10.1103/physrevphyseducres.21.010149>
- Gebreegzabher, S. (2025). Cognition-Inspired Interactive Frameworks for Human-AI Alignment. *Companion Proceedings of the 30th International Conference on Intelligent User Interfaces*. <https://doi.org/10.1145/3708557.3716147>
- Sharma, A., Lin, I., Miner, A., Atkins, D., & Althoff, T. (2022). Human-AI collaboration enables more empathic conversations in text-based peer-to-peer mental health support. *Nature Machine Intelligence*, 5, 46-57. <https://doi.org/10.1038/s42256-022-00593-2>



Ejjami, R. (2024). Revolutionizing Knowledge Synthesis: Introducing AI-Enhanced Collaborative Theory (AIECT). *International Journal For Multidisciplinary Research*. <https://doi.org/10.36948/ijfmr.2024.v06i05.28203>
