# Supplementary material
Source: ML conference proceedings conference paper supplement (https://openreview.net/forum?id=E2XBNokxDy)
Supplement: supplementary_material [file README.pdf › supplementary/SM_II_Verbatim_Logs/README.pdf]

# Supplementary Material II: AI-Native Auto-Ethnography in Action

## A Curated Collection of Verbatim Logs

### 1. Introduction: The “Living Evidence” of a Symbiotic Dialogue

This directory contains a curated collection of high-fidelity, verbatim logs from the CHAC Workbench. Its purpose is to offer “living evidence” for the AI-Native Auto-Ethnography methodology detailed in **Chapter 4** of our main paper.

Each log file in this directory captures a critical, unscripted collaborative moment, revealing the dynamic and profound process by which our framework’s core theories emerged from practice. These logs are the primary, raw data supporting the interpretive reconstructions presented in our appendices (especially **Appendix G**) and case studies (**Supplementary Material IV**).

### 2. Log Compendium: Guide to the Files

Below is a guide to the six log files contained in this directory. Each entry provides the context for the log and its direct evidentiary link to the main paper.

#### Log 1: The “Spark” Dialogue

- **File:** SM\_II\_Log\_1\_Spark\_Dialogue.md
- **Context:** Documents the pivotal conversation where the AI partner’s role evolved from “catering” to “guarding.”
- **Evidentiary Link:** Primary evidence for the relational precondition of **psychological safety** discussed in **Appendix G.2**.

#### Log 2: The “Genesis” Log

- **File:** SM\_II\_Log\_2\_Genesis\_Log.md
- **Context:** Captures the exact moment the 2x2 Compensation Matrix was discovered, catalyzed by a Socratic question.
- **Evidentiary Link:** Ground truth for the analysis of the **Socratic Negentropic Loop** presented in **Appendix G.3**.

#### Log 3: The “Doctrine” Log

- **File:** SM\_II\_Log\_3\_Doctrine\_Log.md
- **Context:** Records the philosophical stress test of the 2x2 matrix, leading to the “Doctrine of Openness.”
- **Evidentiary Link:** Primary evidence for the **“Fifth Quadrant” principle** discussed in **Appendix G.4.4**, and the human’s role as a “cognitive circuit breaker.”

#### Log 4: The Birth of M70

- **File:** SM\_II\_Log\_4\_M70\_Log.md
- **Context:** Documents the co-creation of the “Informed Proceeding” protocol.
- **Evidentiary Link:** Raw data supporting the narrative reconstruction in the **M70 Case Study (Supplementary Material IV)**.

#### Log 5: The Reframing of Chapters

- **File:** SM\_II\_Log\_5\_Reframing\_Log.md

- **Context:** Records the metacognitive intervention that strategically reframed Chapters 6 and 7 of the main paper.
- **Evidentiary Link:** A meta-artifact demonstrating the application of our methodology to the research process itself.

#### **Log 6: A Stress Test of Intellectual Honesty**

- **File:** SM\_II\_Log\_6\_Negentropy\_Repair\_Log.md
- **Context:** Documents the self-correction process after identifying a flawed citation for the “negentropy” concept.
- **Evidentiary Link:** The most profound evidence for the **BFT** and **“Failure as Data”** principles in action, applied to the paper’s own academic integrity.
