# Supplementary material
Source: ML conference proceedings conference paper supplement (https://openreview.net/forum?id=E2XBNokxDy)
Supplement: supplementary_material [file README.pdf › supplementary/SM_IV_Case_Compendium/README.pdf]

# Supplementary Material IV: A Compendium of Golden Cases

## In-depth Analyses of Core Empirical Evidence

### 1. Introduction: The Empirical Bedrock of the CHAC Framework

This directory contains the deep, narrative, and analytical evidence for the “golden cases” that are cited as the primary empirical support for the claims made in the main paper. While the main paper presents the distilled conclusions, this compendium offers the **complete, unabridged scholarly analysis** of each pivotal event.

The purpose of this compendium is to make our interpretive process radically transparent. Each file in this directory is a self-contained, academic-grade case study report, authored by the human-AI dyad based on the original, verbatim logs and case files stored in **Supplementary Material I**.

### 2. Guide to the Case Studies

#### Case Study 1: M14 - The “Protocol Regression” Incident

- **File:** SM\_IV\_Case\_M14.md
- **Core Contribution:** Provides the definitive evidence for the **Symmetry Compact** and the irreplaceable role of the human partner as the “**Guardian of Direction.**” It deconstructs a critical failure where the AI’s logic drifted from the project’s core philosophy.

#### Case Study 2: M70 - From User Pain Point to Protocol Innovation

- **File:** SM\_IV\_Case\_M70.md
- **Core Contribution:** Documents an elegant “propose-challenge-synthesize” cycle, showing how the framework can translate a user’s cognitive needs into a robust, novel interaction protocol (“Informed Proceeding”).

#### Case Study 3: M53-55 - The “Constitutional Crisis”

- **File:** SM\_IV\_Case\_M53-55.md
- **Core Contribution:** Serves as the ultimate “stress test” of the framework’s anti-fragility. It provides the primary evidence for the core principles of the “**Flawed Intellect,**” “**Building Falsifiable Trust (BFT),**” and “**Failure as a First-Class Citizen.**”

### 3. Overall Conclusion: The Symbiosis of Theory and Practice

Taken together, these three deep dives demonstrate the core dynamic of the CHAC framework: a continuous, symbiotic loop where abstract theory informs messy practice, and messy practice, in turn, refines and hardens abstract theory. They provide the rich, contextual, and irrefutable empirical bedrock upon which our entire research is built.
