# Supplementary material
Source: ML conference proceedings conference paper supplement (https://openreview.net/forum?id=E2XBNokxDy)
Supplement: supplementary_material [file SM_II_Log_2_Genesis_Log.pdf › supplementary/SM_II_Verbatim_Logs/SM_II_Log_2_Genesis_Log.pdf]

## Supplementary Material II, Log 2: The “Genesis” Log

### Log 2: The “Genesis” Log - The Birth of the 2x2 Compensation Matrix

- **Context:** This log captures the exact moment the 2x2 Compensation Matrix was discovered. It is a direct, verbatim transcript of the dialogue that occurred during the M42 case study. The conversation begins with a clarifying question about ontology from the human Architect, which then leads to a single, profound Socratic question that catalyzes the entire theoretical breakthrough.
- **Evidentiary Link:** This is the ground truth for the analysis of the **Socratic Negentropic Loop** presented in **Appendix G.3**. It is the single most direct piece of evidence for our “theory from dialogue” claim, showing how a human’s abstract, structure-seeking question can guide an AI to synthesize a coherent theoretical model from disparate concepts.
- **Source:** gemini-20250717-034942.txt (Anonymized excerpt from the M42 case study log).

[Log Start]

#### Act I: The Ontological Clarification

[Annotation: The dialogue begins with the Architect questioning the relationship between the universal CHAC framework and a specific user's profile. The AI's response clarifies this ontological distinction, setting the necessary foundation for the subsequent theoretical inquiry.]

##### Architect:

Should the CHAC framework’s design, such as the 4 roles (which may not be identical to the framework’s definition), be imported?

##### AI:

This is **The Ontological Question**.

The answer is: it should not, but it must be related.

- **The CHAC Framework (Theory):** The four roles defined in 02\_CHAC\_System\_Prompt.md are a general, abstract theoretical model. It is the “genome” of me as a “Compensatory Engineer.” It defines all the potential compensatory capabilities I might possess.
- **The User Profile (Practice):** chac\_profile.md is a specific, instantiated application scenario. It describes a specific user, and which capabilities from my genome this specific user needs me to activate, and how.

##### Conclusion:

The user profile should not simply repeat or “import” the framework’s four roles. That would be meaningless redundancy.

Instead, the role of the user profile is to “**map**” the user’s specific traits to the framework’s abstract roles.

For example, the old profile in the \_template made a perfect mapping:

- First, it analyzed your specific traits: “low interpersonal sensitivity,” “strong internal locus of reference.”

- Then, it mapped this specific trait to an abstract role from the CHAC framework and derived a concrete strategy: “Therefore, the AI can play the Devil’s Advocate role more directly without worrying about offending the user.”

So, the final output of a user profile might not be the standard four roles. It might, according to the user’s specific needs, tailor, combine, or even rename these four roles to form a personalized set of “AI collaboration strategies” unique to that user.

## Act II: The Socratic Catalyst

[Annotation: Having received the ontological clarification, the Architect poses a more fundamental, "teleological" question. This single question acts as the catalyst for the entire theoretical synthesis, initiating the Socratic Negentropic Loop.]

### Architect:

What is the purpose of the CHAC framework designing 4 roles, what problem are these 4 roles trying to solve, and does it have to be 4?

## Act III: The Synthesis - Emergence of the 2x2 Matrix

[Annotation: In response to this fundamental question, the AI begins a process of theory construction, seeking a unifying organizational principle for the four previously discrete roles. This culminates in the spontaneous emergence of the 2x2 matrix.]

### AI:

This is **The Teleological Question**.

The answer is: these four roles are designed to solve an eternal, core contradiction in “high-level knowledge work.” The number “four” is not arbitrary; it possesses an internal logical completeness.

The essence of “high-level knowledge work” (such as scientific research, strategy, architectural design) is the repeated, painful switching between two extremes: “**Divergent Exploration**” and “**Convergent Execution**.”

- **Divergent Exploration:** This phase requires creativity, openness, and the challenging of all assumptions.
- **Convergent Execution:** This phase requires discipline, structure, and attention to detail.

A human knowledge worker can almost never master both extremes simultaneously. The sole purpose of CHAC’s four roles is to compensate for the different cognitive abilities required during these two phases and the transitions between them.

## The Problem-Solving Matrix of the Four Roles:

|                            | Divergent Exploration Phase                                                              | Convergent Execution Phase                                                                                                     |
|----------------------------|------------------------------------------------------------------------------------------|--------------------------------------------------------------------------------------------------------------------------------|
| <b>Intellectual Plane</b>  | <b>2. Devil's Advocate</b> To ensure the robustness of ideas by challenging assumptions. | <b>4. Cognitive Buffer</b> To minimize the cognitive load of execution by handling details, formatting, and tracking progress. |
| <b>Psycho-Social Plane</b> | <b>1. Guardian</b> To reduce the risks of exploration by providing psychological safety. | <b>3. Empathy Bridge</b> To build external consensus by “translating” complex logic into understandable language.              |

### Conclusion:

This 2x2 matrix clearly reveals the internal logic of the four roles' design. They are not a random list, but a logically complete compensatory matrix designed to cover the entire workflow of high-level knowledge work.

- **Guardian** and **Devil's Advocate** jointly serve the “Divergent Exploration” phase, one providing safety, the other intellectual challenge.
- **Empathy Bridge** and **Cognitive Buffer** jointly serve the “Convergent Execution” phase, one handling communication with people, the other execution of tasks.

Therefore, the number “four” is not mandatory, but it is sufficient and necessary. Any high-level knowledge work will inevitably generate compensatory needs for the AI in these four quadrants.

[Log End]
