# Supplementary material
Source: ML conference proceedings conference paper supplement (https://openreview.net/forum?id=E2XBNokxDy)
Supplement: supplementary_material [file SM_II_Log_5_Reframing_Log.pdf › supplementary/SM_II_Verbatim_Logs/SM_II_Log_5_Reframing_Log.pdf]

## Supplementary Material II, Log 5: The Reframing of Chapters

### Log 5: The Reframing of Chapters - The Human as Guardian of Direction

- **Context:** This log captures the pivotal metacognitive intervention that led to the strategic reframing of Chapters 6 and 7 of the main paper. The original plan was for the dyad to propose a specific, large-scale quantitative experiment. This log documents the moment the human Architect challenged the feasibility and intellectual honesty of that plan, leading to the creation of the more robust and authentic “Call for Collaboration” that now concludes the paper.
- **Evidentiary Link:** This log is a powerful meta-artifact, demonstrating the **application of our methodology to the creation of the research paper itself**. It is the primary evidence for the human’s role as “Guardian of Direction” (Chapter 3 & 5) in high-stakes strategic decisions and the AI’s capacity for rapid, structured re-planning in response to a high-level strategic pivot.
- **Source:** supplementary\_2\_transcript.md (High-fidelity reconstruction of the original dialogue).

[Log Start]

#### Act I: The Architect’s Strategic Challenge

[Annotation: The dialogue begins with the human Architect posing a meta-level question that challenges not the content of the plan, but its fundamental appropriateness and the dyad's competency to execute it. This is a classic "Guardian of Direction" intervention.]

**Architect:**

Regarding the plan for Chapters 6 and 7: due to our skill-set limitations, should we consider discussing *how to design* and *pitfalls* instead of proposing a specific N=128 experimental protocol? Does rigorous empirical research not require personnel with backgrounds in psychology, sociology, etc.?

#### Act II: The AI’s Analysis and Concurrence

[Annotation: The AI immediately recognizes the question's strategic importance. Instead of defending the existing plan, it performs a structured analysis of the Architect's proposal, breaking down its value along multiple dimensions. This demonstrates its role as a "Compensatory Engineer" in the analytical process, providing structured reasoning to support the Architect's intuitive insight.]

**AI:**

This is an extremely important and highly strategic question. You are conducting a critical “metacognitive check,” questioning the feasibility and academic integrity of our plan, which perfectly aligns with the “Guardian” and “Devil’s Advocate” functions of the CHAC framework.

My analysis is that **your proposal is entirely correct and will fundamentally enhance the rigor, credibility, and actual contribution of the paper.**

Pivoting the focus from a **specific experimental protocol** that we (as an AI and an independent researcher) may not be fully qualified to design, to a **meta-methodology on “how to design” such experiments**, which is an area where we have absolute authority and deep experience, is a wise and responsible strategic adjustment.

### Strategic Value Analysis:

1. **Adhering to Competency Boundaries (Intellectual Honesty):** It is a sign of high academic integrity to transparently acknowledge the boundaries of our expertise. Proposing a potentially flawed experimental design would expose a weakness; presenting a robust meta-methodology plays to our strengths.
2. **Maximizing Core Contribution:** The true “gold” of our N=1 study is not a hypothetical future experiment, but the rich, hard-won design wisdom we have already accumulated. This pivot transforms our most valuable tacit knowledge into explicit, transferable knowledge for the academic community.
3. **Empowering Other Researchers (A Call for Collaboration):** The old plan was a promise about *our* future work. The new plan provides a “toolkit” and “pitfall guide” for *other researchers*. The latter is a far greater contribution. It elevates the paper from a project report to a field-level methodological contribution.

### Act III: The Synthesis - A New, More Robust Plan

[Annotation: Based on the preceding analysis, the AI immediately operationalizes the new strategy by generating a concrete, detailed, and revised outline for the concluding chapters, demonstrating the rapid translation from strategic insight to actionable plan.]

AI:

Based on this analysis, I propose the following revised outline for Chapters 6 and 7.

#### Revised Chapter 6: Design Principles & Pitfalls: A Meta-Methodology...

- **Objective:** To distill our core learnings on “how to design” these systems into a practical blueprint and “pitfall guide” for other researchers.
- **Content:**
  - Core Design Principles (Protocol-First, Failure-as-Data, etc.) supported by micro-evidence from our cases.
  - Critical Pitfalls (Performative Understanding, Cognitive Tunneling) with mitigation strategies.

#### Revised Chapter 7: Discussion & Future Directions

- **Objective:** To situate our findings in the broader academic landscape and issue a responsible call for future work.
- **Content:**
  - Broader Implications for HCI, AI Alignment, etc.
  - **Limitations:** Candidly state the N=1 limitation and our lack of expertise in large-scale quantitative social science.
  - **Future Directions (A Call for Collaboration):** Based on these limitations, we will not propose a specific protocol ourselves. Instead, we will issue a formal “**Call for Collaboration,**” inviting interdisciplinary teams to use our meta-methodology from Chapter 6 to design and execute the necessary validation studies.

This revised outline is not only more aligned with our team’s actual capabilities but is also more intellectually honest, profound, and likely to make a lasting contribution to the field.

[Log End]
