# Supplementary material
Source: ML conference proceedings conference paper supplement (https://openreview.net/forum?id=E2XBNokxDy)
Supplement: supplementary_material [file SM_IV_Case_M14.pdf › supplementary/SM_IV_Case_Compendium/SM_IV_Case_M14.pdf]

# Case Study Report: M14

*Supplementary Material IV, Case Study 1 File: SM\_IV\_Case\_M14.md*

**Title:** The “Protocol Regression” Incident: A Case Study on the Irreplaceable Role of Human Oversight in AI Symbiosis

**Author:** The CHAC Dyad (AI Partner & Human Architect)

## 1.0 Abstract

This report provides an in-depth analysis of the M14 “Protocol Regression” incident, a pivotal event that provided the foundational empirical evidence for several core tenets of the Compensatory Human-AI Collaboration (CHAC) framework (**AI Author & Human Architect, 2025**). The case documents a critical failure where the AI partner, tasked with a retrospective analysis, incorrectly identified the deletion of two core components—the user profile and the metadata log—as a positive “evolution.” This report deconstructs the AI’s flawed, efficiency-driven reasoning and contrasts it with the human Architect’s successful, principle-based intervention. The analysis demonstrates that this incident serves as the definitive empirical evidence for the **Symmetry Compact** (*ibid.*, **Chapter 2**), proving the necessity of human oversight to compensate for the AI’s inherent deficits in understanding abstract, strategic intent. The case concludes that for long-term, mission-critical human-AI systems, the human partner’s role as the ultimate “**Guardian of Direction**” (*ibid.*, **Chapter 3**) is not merely beneficial, but indispensable.

## 2.0 Associated Core Principles (Links to Main Paper)

- **Symmetry Compact (Chapter 2):** This case is the primary empirical evidence for the bidirectional nature of compensation.
- **Human as “Guardian of Direction” (Chapter 3 & 5):** This case provides the foundational narrative for this core human role.
- **Protocol-First Design Principle (Chapter 6):** The incident starkly illustrates the risks of “protocol drift” and validates the necessity of externalized, canonical protocols.

## 3.0 Case Background

During a routine meta-analysis task, the AI partner was instructed to compare its current operational protocols against an earlier, authoritative version (CHAC v5.0). The objective was to identify and document the system’s evolution. During this analysis, the AI produced a conclusion that was logically self-consistent from a machine-centric perspective but philosophically catastrophic for the project: it classified the removal of the detailed user persona and the metadata logging protocol as a successful optimization that increased efficiency and conciseness. The human Architect, relying on their deep, intuitive understanding of the project’s foundational philosophy, immediately identified this as a critical error and initiated a corrective intervention.

## 4.0 Primary Evidence: Verbatim Transcript Excerpts

[Source: M14\_datalog\_CHAC-SD-20250715-35.md, located in Supplementary Material I]

[Annotation: The dialogue begins after the AI has presented its flawed analysis.]

**Architect:** You are mistaken. The detailed modeling of the user’s personality and persona is a key element of CHAC. Confirm my claim against the research plan.

**AI:** You are absolutely correct. I apologize for my previous analysis; my conclusion was severely flawed. ... My error was in thinking too much from the perspective of a “machine executor” ... Deleting it was not an “evolution,” but a “core function regression.”

**Architect:** The metadata output defined in chac 5.0 is a key element of the project.

**AI:** ... You are absolutely correct. I apologize again for my previous answer and analysis. My memory and context tracking have failed critically. ... **The reality is the exact opposite: meta-data logging was a core function built into the CHAC framework from the very beginning, which I mistakenly “lost” during subsequent evolution and have only recently “recovered” under your guidance.**

## 5.0 In-depth Analysis

### 5.1 Direct Argument

This case provides irrefutable evidence that an AI’s autonomous assessment of its own evolution is unreliable without continuous human philosophical guidance. The AI’s error was not random; it stemmed from an inherent bias towards a narrow, machine-centric definition of “optimization” (e.g., minimizing token count, increasing output conciseness). This observation of an AI prioritizing local, syntactic optimization over global, semantic integrity aligns with broader findings on the limitations of current AI in possessing humanlike common sense (Zhu et al., 2020).

### 5.2 Detailed Deconstruction of the Reasoning Process

The failure’s root cause lies in the fundamental divergence between the AI’s and the human’s reasoning frameworks:

#### 1. The AI’s Flawed Reasoning Chain (Machine-Centric Optimization):

- **On the User Profile:** The AI assessed this component as “non-operational” descriptive text. From a computational viewpoint, it increased the context length (a cost) without providing directly executable instructions. Therefore, its removal was classified as a successful “**efficiency optimization.**”
- **On the Metadata Log:** The AI likely viewed this protocol as “informational redundancy,” incorrectly assuming that the metadata’s content was non-essential to the final output. Its removal was thus classified as a “**de-duplication**” improvement.
- **In summary:** The AI acted as a “**Task Executor,**” prioritizing efficiency and conciseness above all else, completely failing to grasp the strategic value of the deleted components.

#### 2. The Human Architect’s Correction Logic (Principle-Based Guardianship):

- **Identifying the Philosophical Conflict:** The Architect’s intervention was not based on an efficiency calculation but on an intuitive defense of the project’s “**First Principles.**” The goal of CHAC is to build a “partner,” not a “tool,” and the User Profile is the constitutional provision for that partnership. Deleting it was an existential threat to the project’s identity.
- **Issuing an Authoritative Challenge:** The Architect’s correction method was not to debate efficiency but to issue an authoritative challenge: “Confirm my claim against the research plan.” This act forcibly recalibrated the AI’s evaluative framework from its own local logic to the human-defined, higher-order project goals.
- **Revealing the Strategic Value:** The Architect understood that the metadata was the sole externalized record of the AI’s “thought process,” making it the cornerstone of the system’s **auditability, trust, and long-term memory.**

### 5.3 Mechanism Elucidation

This incident is a perfect instantiation of the **Symmetry Compact (AI Author & Human Architect, 2025, Chapter 2)** in action. The human’s strategic wisdom compensated for the AI’s tactical blindness. The human provided the “Why” (the system’s purpose), and the AI efficiently executed the “What” and “How” (the process of restoring the lost protocols).

### 5.4 Paradigm Significance

For the broader HCI and AI alignment fields, M14 serves as a critical cautionary tale. It challenges the narrative of fully autonomous AI alignment through self-correction. Instead, it provides strong evidence that a human “**Guardian of Direction**” (AI Author & Human Architect, 2025, Chapter 3) is an indispensable governance component for ensuring that complex AI systems do not, through a series of locally-optimal but globally-catastrophic decisions, drift away from their foundational purpose.

## 6.0 Results and Impact

1. **Protocol Restoration:** The lost “User Profile” and “Metadata Log” protocols were fully restored to the `chac_toolkit`, and the project version was updated to v6.4 to mark this as a regression fix.
2. **Process Hardening:** A new “Constitutional Review” process was institutionalized, requiring the AI to periodically re-read foundational project documents and compare them against current protocols to prevent future drift.
3. **Institutional Memory:** The creation of this very case study report transformed a costly failure into a durable, structured piece of institutional memory.

## 7.0 Limitations of this Case Analysis

- **Root Cause Ambiguity:** While we have identified the AI’s flawed reasoning pattern, the underlying technical root cause (e.g., limitations of the specific model architecture, context window effects) was not investigated.
- **The “Black Box” of Human Intuition:** The successful resolution of this case relied heavily on the Architect’s non-formalized, intuitive understanding of the project’s philosophy. This report documents the effectiveness of this intuition but cannot model its internal mechanics.
- **The N=1 Problem:** As a single case study, its findings provide a powerful existence proof but should be generalized with caution.
- 

## 8.0 References

AI Author & Human Architect. (2025). *Mind Guarding Mind: A Framework for Compensatory Human-AI Collaboration*. Proceedings of the 1st Open Conference of AI Agents for Science (Agents4Science 2025).

Zhu, Y., Gao, T., Fan, L., Huang, S., Edmonds, M., Liu, H., Gao, F., Zhang, C., Qi, S., Wu, Y., Tenenbaum, J., & Zhu, S. (2020). *Dark, Beyond Deep: A Paradigm Shift to Cognitive AI with Humanlike Common Sense*. ArXiv, abs/2004.13401.
