# Supplementary material
Source: ML conference proceedings conference paper supplement (https://openreview.net/forum?id=E2XBNokxDy)
Supplement: supplementary_material [file What_alternative_human-AI_partnership_models_exist.pdf › case-study/A05_Drafting_the_A4S_Paper/consensus_output/prompt_5_4/What_alternative_human-AI_partnership_models_exist.pdf]

# Alternative Human-AI Partnership Models for Shared Agency and Collaborative Goal-Setting in Open-Ended Creative Tasks

## 1. Introduction

The landscape of human-AI collaboration in creative tasks is rapidly evolving beyond the traditional "human-in-the-loop" (HITL) paradigm, which typically positions humans as supervisors or final arbiters of AI-generated outputs. Recent research highlights a shift toward partnership models emphasizing **shared agency** and **collaborative goal-setting**, where humans and AI systems act as co-creators, jointly exploring, generating, and evaluating creative solutions (Rezwana & Maher, 2022; Vinchon et al., 2023; Haase & Pokutta, 2024; McGuire et al., 2024; Issak et al., 2025; Moruzzi & Margarido, 2024; Zhang et al., 2023; Zhou et al., 2024; He et al., 2023; Rezwana & Maher, 2022). These alternative models—such as co-creative frameworks, mixed-initiative systems, and human-AI teaming—enable more dynamic, reciprocal, and flexible interactions, fostering greater innovation and creative diversity. Studies demonstrate that such partnerships can enhance both the quality and novelty of creative outputs, support user agency and satisfaction, and address the limitations of supervision-based approaches (Boussioux et al., 2024; Rezwana & Maher, 2022; McGuire et al., 2024; Hosanagar & Ahn, 2024; Zhang et al., 2023; Issak et al., 2025; Moruzzi & Margarido, 2024; Rezwana & Maher, 2022; Zhou et al., 2024; Kim & Maher, 2023). This review synthesizes the state of the art in alternative human-AI partnership models, focusing on frameworks, empirical findings, and design considerations for shared agency and collaborative goal-setting in open-ended creative domains.

**FIGURE 1** Consensus on shared agency in human-AI creative partnerships

## 2. Methods

A comprehensive literature search was conducted across over 170 million research papers in Consensus, encompassing databases such as Semantic Scholar and PubMed. The search strategy included targeted queries on alternative human-AI partnership models, shared agency, collaborative goal-setting, and co-creative systems in creative tasks. In total, 1,025 papers were identified, 579 were screened, 401 were deemed eligible, and the top 50 most relevant papers were included in this review.

## Search Strategy

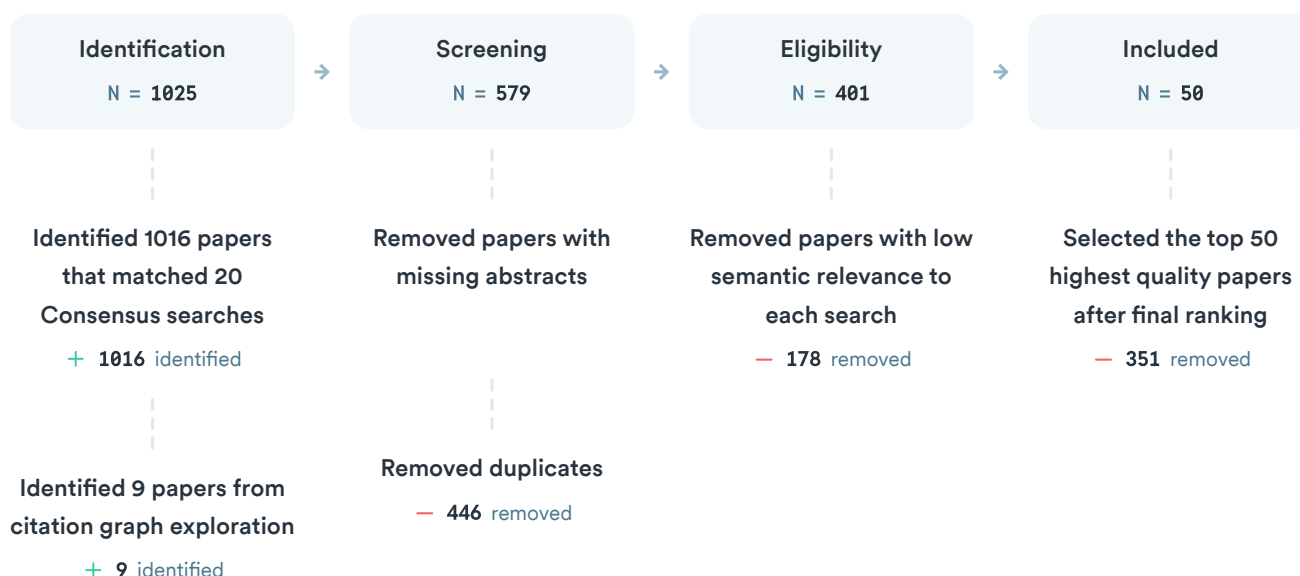

FIGURE 1 Flow of paper selection for this review

Eight unique search groups were used, focusing on foundational paradigms, alternative models, interdisciplinary perspectives, and comparative analyses of partnership frameworks.

## 3. Results

### 3.1. Key Alternative Partnership Models

Several partnership models have emerged beyond HITL, including:

- **Co-creative frameworks:** Both human and AI contribute creative input, often in iterative or turn-taking processes (Rezwana & Maher, 2022; Moruzzi & Margarido, 2024; Zhang et al., 2023; Issak et al., 2025; Rezwana & Maher, 2022; Kim & Maher, 2023).
- **Mixed-initiative systems:** Humans and AI proactively take initiative, share control, and negotiate creative direction (Issak et al., 2025; Rezwana & Maher, 2022; Margarido et al., 2024; Ding & Chan, 2023).
- **Human-AI teaming:** Emphasizes mutual knowledge gains, trust-building, and productive dialogue for value co-creation (Simón et al., 2024; Iga et al., 2024; Mahmud et al., 2022; Haase & Pokutta, 2024).
- **Personalized and adaptive systems:** AI adapts to user preferences, supporting agency and ownership (Abuzurairq & Pasquier, 2024; Moruzzi & Margarido, 2024; Zhang et al., 2023).

### 3.2. Shared Agency and Collaborative Goal-Setting

Research demonstrates that shared agency—where both human and AI have meaningful influence over creative outcomes—leads to higher user satisfaction, creative self-efficacy, and more innovative results (McGuire et al., 2024; Rezwana & Maher, 2022; Moruzzi & Margarido, 2024; Zhang et al., 2023; Issak et al., 2025; Rezwana & Maher, 2022). Collaborative goal-setting, where humans and AI jointly define objectives and criteria, is shown to foster deeper engagement and more diverse creative exploration (Rezwana & Maher, 2022; Zhou et al., 2024; Shen et al., 2025; Cao et al., 2025).

### 3.3. Comparative Outcomes and User Experience

Empirical studies reveal that:

- Co-creative and mixed-initiative models outperform supervision-based approaches in terms of creative quality, diversity, and user engagement (Boussioux et al., 2024; Rezwana & Maher, 2022; McGuire et al., 2024; Hosanagar & Ahn, 2024; Zhang et al., 2023; Issak et al., 2025; Moruzzi & Margarido, 2024; Rezwana & Maher, 2022; Zhou et al., 2024; Kim & Maher, 2023).
- Human-AI partnerships that emphasize communication, transparency, and flexible role negotiation are perceived as more reliable and intelligent (Rezwana & Maher, 2022; Lawton et al., 2023; Rezwana et al., 2021).
- The design of interaction models (e.g., real-time collaboration, iterative feedback, embodied agents) significantly impacts user perceptions of agency and partnership (Rezwana & Maher, 2022; Lawton et al., 2023; Lin et al., 2020; Rezwana et al., 2021).

### 3.4. Challenges and Design Considerations

Key challenges include balancing control and initiative, mitigating biases, ensuring ethical and inclusive collaboration, and supporting personalization (Vinchon et al., 2023; Rezwana & Maher, 2022; Moruzzi & Margarido, 2024; Zhang et al., 2023; Issak et al., 2025; Abuzuraiq & Pasquier, 2024; McGuire et al., 2024). Frameworks such as COFI (Rezwana & Maher, 2022), MOSAIC (Issak et al., 2025), and user-centered models (Moruzzi & Margarido, 2024) provide actionable guidelines for designing effective co-creative systems.

#### Key Papers

| Paper                       | Model/Framework         | Domain                   | Main Contribution                                                           | Sample/Method                  |
|-----------------------------|-------------------------|--------------------------|-----------------------------------------------------------------------------|--------------------------------|
| (Rezwana & Maher, 2022)     | COFI Framework          | Co-creative systems      | Categorizes interaction models, highlights communication and shared agency  | 92 systems analyzed            |
| (McGuire et al., 2024)      | Experimental study      | Poetry writing           | Shows co-creation (not editing) with AI boosts creativity and self-efficacy | 2 experiments                  |
| (Issak et al., 2025)        | MOSAIC Framework        | Computational creativity | Balances autonomy, authority, initiative in co-creation                     | Systematic review (172 papers) |
| (Moruzzi & Margarido, 2024) | User-centered framework | Mobile co-creation       | Identifies dimensions of agency/control, proposes customization tool        | Framework + prototype          |
| (Zhang et al., 2023)        | Three-level framework   | Sculpture design         | Flexible AI involvement, user-adjustable levels                             | Prototype + user study         |

**FIGURE 2** Comparison of key studies on alternative human-AI partnership models.

### Top Contributors

| Type    | Name                                                                           | Papers                                                                                                         |
|---------|--------------------------------------------------------------------------------|----------------------------------------------------------------------------------------------------------------|
| Author  | M. Maher                                                                       | (Rezwana & Maher, 2022; Moruzzi & Margarido, 2024; Kim et al., 2021; Rezwana & Maher, 2022; Kim & Maher, 2023) |
| Author  | Jeba Rezwana                                                                   | (Rezwana & Maher, 2022; Rezwana & Maher, 2022; Issak et al., 2025; Rezwana et al., 2021)                       |
| Author  | Jingoog Kim                                                                    | (Kim et al., 2021; Kim & Maher, 2023)                                                                          |
| Journal | <i>Proceedings of the CHI Conference on Human Factors in Computing Systems</i> | (Zhou et al., 2024; Han et al., 2024; Liu et al., 2023; Shen et al., 2025; Cao et al., 2025)                   |
| Journal | <i>ArXiv</i>                                                                   | (Haase & Pokutta, 2024; Hosanagar & Ahn, 2024; Davis & Rafner, 2025; Ding & Chan, 2023)                        |
| Journal | <i>The Journal of Creative Behavior</i>                                        | (Tang et al., 2024; Vinchon et al., 2023)                                                                      |

**FIGURE 3** Authors & journals that appeared most frequently in the included papers.

## 4. Discussion

The reviewed literature demonstrates a clear trend toward partnership models that move beyond the limitations of supervision-based HITL paradigms, enabling richer forms of shared agency and collaborative goal-setting in creative tasks (Rezwana & Maher, 2022; McGuire et al., 2024; Issak et al., 2025; Moruzzi & Margarido, 2024; Zhang et al., 2023; Rezwana & Maher, 2022; Zhou et al., 2024; Kim & Maher, 2023). High-quality frameworks such as COFI and MOSAIC provide robust theoretical and practical foundations for designing such systems, emphasizing the importance of communication, flexible control, and mutual initiative (Rezwana & Maher, 2022; Issak et al., 2025). Empirical studies consistently show that co-creative and mixed-initiative models yield superior creative outcomes and user experiences compared to traditional approaches (Boussieux et al., 2024; McGuire et al., 2024; Hosanagar & Ahn, 2024; Zhang et al., 2023; Rezwana & Maher, 2022; Zhou et al., 2024; Kim & Maher, 2023). However, challenges remain in balancing autonomy, ensuring ethical collaboration, and supporting personalization and inclusivity (Vinchon et al., 2023; Moruzzi & Margarido, 2024; Abuzuraiq & Pasquier, 2024; Issak et al., 2025). The field is still developing standardized metrics and best practices for evaluating shared agency and collaborative goal-setting, and more longitudinal and domain-specific studies are needed.

## Claims and Evidence Table

| Claim                                                                                                                    | Evidence Strength                                                                               | Reasoning                                                                                                    | Papers                                                                                                                                                 |
|--------------------------------------------------------------------------------------------------------------------------|-------------------------------------------------------------------------------------------------|--------------------------------------------------------------------------------------------------------------|--------------------------------------------------------------------------------------------------------------------------------------------------------|
| Co-creative and mixed-initiative models enhance creative quality and user satisfaction over supervision-based approaches | <br>Strong     | Multiple experiments and reviews show higher creativity, satisfaction, and diversity in co-creative settings | (Rezwana & Maher, 2022; McGuire et al., 2024; Hosanagar & Ahn, 2024; Zhang et al., 2023; Rezwana & Maher, 2022; Zhou et al., 2024; Kim & Maher, 2023)  |
| Shared agency and collaborative goal-setting foster deeper engagement and innovation                                     | <br>Strong     | User studies and frameworks highlight increased engagement, self-efficacy, and creative exploration          | (Rezwana & Maher, 2022; Moruzzi & Margarido, 2024; Zhang et al., 2023; Issak et al., 2025; Rezwana & Maher, 2022; Shen et al., 2025; Cao et al., 2025) |
| Effective communication and flexible control are critical for successful human-AI partnerships                           | <br>Strong     | Design frameworks and user studies emphasize the need for two-way communication and adaptable roles          | (Rezwana & Maher, 2022; Rezwana & Maher, 2022; Issak et al., 2025; Moruzzi & Margarido, 2024; Rezwana et al., 2021)                                    |
| Personalization and adaptive systems support user agency and ownership                                                   | <br>Moderate | Emerging research shows personalized AI models increase sense of control and creative ownership              | (Abuzurairq & Pasquier, 2024; Moruzzi & Margarido, 2024; Zhang et al., 2023)                                                                           |
| Challenges remain in balancing autonomy, mitigating bias, and ensuring ethical collaboration                             | <br>Moderate | Reviews and position papers identify ongoing issues in control, bias, and inclusivity                        | (Vinchon et al., 2023; Issak et al., 2025; Moruzzi & Margarido, 2024; Abuzurairq & Pasquier, 2024)                                                     |
| Standardized evaluation metrics for shared agency are underdeveloped                                                     | <br>Weak     | Few studies provide robust, generalizable metrics for agency and goal-setting in co-creative systems         | (Issak et al., 2025; Moruzzi & Margarido, 2024; Margarido et al., 2024)                                                                                |

**FIGURE 4** Key claims and support evidence identified in these papers.

## 5. Conclusion

Alternative human-AI partnership models—especially those emphasizing shared agency and collaborative goal-setting—offer significant advantages over traditional supervision-based paradigms in open-ended creative tasks. These models foster greater innovation, user satisfaction, and creative diversity, but require careful design to balance control, communication, and ethical considerations.

### 5.1. Research Gaps

Despite progress, gaps remain in the standardization of evaluation metrics, long-term studies of shared agency, and the development of domain-specific best practices for collaborative goal-setting and personalization.

#### Research Gaps Matrix

| Topic/Model                 | Design Frameworks | User Studies | Longitudinal Studies | Personalization | Evaluation Metrics |
|-----------------------------|-------------------|--------------|----------------------|-----------------|--------------------|
| Co-creative frameworks      | 7                 | 8            | 1                    | 2               | 2                  |
| Mixed-initiative systems    | 5                 | 4            | 1                    | 1               | 1                  |
| Human-AI teaming            | 3                 | 3            | GAP                  | 1               | GAP                |
| Personalization/adaptive AI | 2                 | 2            | GAP                  | 3               | GAP                |
| Evaluation/metrics          | 1                 | 1            | GAP                  | GAP             | 2                  |

**FIGURE 5** Heatmap of research coverage and gaps by topic and study attribute.

### 5.2. Open Research Questions

Future research should focus on developing robust evaluation metrics, exploring long-term impacts of shared agency, and designing domain-specific, personalized co-creative systems.

| Question                                                                                                       | Why                                                                                                                    |
|----------------------------------------------------------------------------------------------------------------|------------------------------------------------------------------------------------------------------------------------|
| How can we robustly measure shared agency and collaborative goal-setting in human-AI creative partnerships?    | Standardized metrics are needed to compare models, guide design, and assess user experience across domains.            |
| What are the long-term effects of shared agency on user creativity, satisfaction, and skill development?       | Longitudinal studies will reveal whether co-creative partnerships sustain or erode human creative abilities over time. |
| How can co-creative AI systems be effectively personalized to support diverse user needs and creative domains? | Personalization is key to maximizing user agency, ownership, and creative potential in varied contexts.                |

**FIGURE 6** Open research questions for future work on human-AI creative partnerships.

In summary, the field is moving toward richer, more collaborative human-AI partnerships, but further research is needed to standardize evaluation, support personalization, and understand long-term impacts.

*These papers were sourced and synthesized using Consensus, an AI-powered search engine for research. Try it at <https://consensus.app>*

## References

- Boussioux, L., Lane, J., Zhang, M., Jacimovic, V., & Lakhani, K. (2024). The Crowdless Future? Generative AI and Creative Problem-Solving. *Organization Science*. <https://doi.org/10.1287/orsc.2023.18430>
- Tang, M., Hofreiter, S., Werner, C., Zielińska, A., & Karwowski, M. (2024). “Who” Is the Best Creative Thinking Partner? An Experimental Investigation of Human–Human, Human–Internet, and Human–AI Co-Creation. *The Journal of Creative Behavior*. <https://doi.org/10.1002/jocb.1519>
- Vinchon, F., Lubart, T., Bartolotta, S., Gironnay, V., Botella, M., Bourgeois-Bougrine, S., Burkhardt, J., Bonnardel, N., Corazza, G., Glăveanu, V., Hanson, M., Ivcevic, Z., Karwowski, M., Kaufman, J., Okada, T., Reiter-Palmon, R., & Gaggioli, A. (2023). Artificial Intelligence & Creativity: A Manifesto for Collaboration. *The Journal of Creative Behavior*. <https://doi.org/10.1002/jocb.597>
- Mahmud, B., Hong, G., & Fong, B. (2022). A Study of Human–AI Symbiosis for Creative Work: Recent Developments and Future Directions in Deep Learning. *ACM Transactions on Multimedia Computing, Communications and Applications*, 20, 1 - 21. <https://doi.org/10.1145/3542698>
- Rezwana, J., & Maher, M. (2022). Designing Creative AI Partners with COFI: A Framework for Modeling Interaction in Human-AI Co-Creative Systems. *ACM Transactions on Computer-Human Interaction*, 30, 1 - 28. <https://doi.org/10.1145/3519026>
- Haase, J., & Pokutta, S. (2024). Human-AI Co-Creativity: Exploring Synergies Across Levels of Creative Collaboration. *ArXiv*, abs/2411.12527. <https://doi.org/10.48550/arXiv.2411.12527>
- Zhou, J., Li, R., Tang, J., Tang, T., Li, H., Cui, W., & Wu, Y. (2024). Understanding Nonlinear Collaboration between Human and AI Agents: A Co-design Framework for Creative Design. *Proceedings of the 2024 CHI Conference on Human Factors in Computing Systems*. <https://doi.org/10.1145/3613904.3642812>

- He, V., Shrestha, Y., Puranam, P., & Miron-Spektor, E. (2023). Searching Together: A Theory of Human-AI Co-Creativity. *SSRN Electronic Journal*. <https://doi.org/10.2139/ssrn.4603650>
- Moruzzi, C., & Margarido, S. (2024). A User-centered Framework for Human-AI Co-creativity. *Extended Abstracts of the CHI Conference on Human Factors in Computing Systems*. <https://doi.org/10.1145/3613905.3650929>
- Han, Y., Qiu, Z., Cheng, J., & Lc, R. (2024). When Teams Embrace AI: Human Collaboration Strategies in Generative Prompting in a Creative Design Task. *Proceedings of the 2024 CHI Conference on Human Factors in Computing Systems*. <https://doi.org/10.1145/3613904.3642133>
- Hosanagar, K., & Ahn, D. (2024). Designing Human and Generative AI Collaboration. *ArXiv*, abs/2412.14199. <https://doi.org/10.48550/arXiv.2412.14199>
- Lawton, T., Grace, K., & Ibarrola, F. (2023). When is a Tool a Tool? User Perceptions of System Agency in Human-AI Co-Creative Drawing. *Proceedings of the 2023 ACM Designing Interactive Systems Conference*. <https://doi.org/10.1145/3563657.3595977>
- Simón, C., Revilla, E., & Sáenz, M. (2024). Integrating AI in organizations for value creation through Human-AI teaming: A dynamic-capabilities approach. *Journal of Business Research*. <https://doi.org/10.1016/j.jbusres.2024.114783>
- Liu, Y., Chen, S., Cheng, H., Yu, M., Ran, X., Mo, A., Tang, Y., & Huang, Y. (2023). How AI Processing Delays Foster Creativity: Exploring Research Question Co-Creation with an LLM-based Agent. *Proceedings of the 2024 CHI Conference on Human Factors in Computing Systems*. <https://doi.org/10.1145/3613904.3642698>
- Iga, S., Takatsuka, S., & Tetsukawa, H. (2024). Stimulating Creative Hypothesis Discovery by Future Human-AI Teaming. \*\*, 203-211. [https://doi.org/10.1007/978-3-031-67998-8\\_14](https://doi.org/10.1007/978-3-031-67998-8_14)
- Kim, J., Maher, M., & Siddiqui, S. (2021). Collaborative Ideation Partner: Design Ideation in Human-AI Co-creativity. \*\*, 123-130. <https://doi.org/10.5220/0010640800003060>
- Zhang, M., Cheng, Z., Shiu, S., Liang, J., Fang, C., , Z., Fang, L., & Wang, S. (2023). Towards Human-Centred AI-Co-Creation: A Three-Level Framework for Effective Collaboration between Human and AI. *Companion Publication of the 2023 Conference on Computer Supported Cooperative Work and Social Computing*. <https://doi.org/10.1145/3584931.3607008>
- Shen, H., Shen, L., Wu, W., & Zhang, K. (2025). IdeationWeb: Tracking the Evolution of Design Ideas in Human-AI Co-Creation. *Proceedings of the 2025 CHI Conference on Human Factors in Computing Systems*. <https://doi.org/10.1145/3706598.3713375>
- McGuire, J., De Cremer, D., & Van De Cruys, T. (2024). Establishing the importance of co-creation and self-efficacy in creative collaboration with artificial intelligence. *Scientific Reports*, 14. <https://doi.org/10.1038/s41598-024-69423-2>
- Abuzuraig, A., & Pasquier, P. (2024). Towards Personalizing Generative AI with Small Data for Co-Creation in the Visual Arts. \*\*.
- Davis, N., & Rafner, J. (2025). AI Drawing Partner: Co-Creative Drawing Agent and Research Platform to Model Co-Creation. *ArXiv*, abs/2501.06607. <https://doi.org/10.48550/arXiv.2501.06607>
- Ding, Z., & Chan, J. (2023). Mapping the Design Space of Interactions in Human-AI Text Co-creation Tasks. *ArXiv*, abs/2303.06430. <https://doi.org/10.48550/arXiv.2303.06430>
- Rezwana, J., & Maher, M. (2022). Understanding User Perceptions, Collaborative Experience and User Engagement in Different Human-AI Interaction Designs for Co-Creative Systems. *Proceedings of the 14th Conference on Creativity and Cognition*. <https://doi.org/10.1145/3527927.3532789>



Lin, Y., Guo, J., Chen, Y., Yao, C., & Ying, F. (2020). It Is Your Turn: Collaborative Ideation With a Co-Creative Robot through Sketch. *Proceedings of the 2020 CHI Conference on Human Factors in Computing Systems*. <https://doi.org/10.1145/3313831.3376258>

Issak, A., Rezwana, J., & Harteveld, C. (2025). MOSAAIC: Managing Optimization towards Shared Autonomy, Authority, and Initiative in Co-creation. \*\*.

Cao, Y., Huang, Y., Truong, A., Shin, H., & Xia, H. (2025). Compositional Structures as Substrates for Human-AI Co-creation Environment: A Design Approach and A Case Study. *Proceedings of the 2025 CHI Conference on Human Factors in Computing Systems*. <https://doi.org/10.1145/3706598.3713401>

Margarido, S., Roque, L., Machado, P., & Martins, P. (2024). MI-CCy Quantifier: A Framework for Quantifying Mixed-Initiative Co-creativity in Human-AI Collaborations. \*\*, 3-15. [https://doi.org/10.1007/978-3-031-73497-7\\_1](https://doi.org/10.1007/978-3-031-73497-7_1)

Rezwana, J., Maher, M., & Davis, N. (2021). Creative PenPal: A Virtual Embodied Conversational AI Agent to Improve User Engagement and Collaborative Experience in Human-AI Co-Creative Design Ideation. \*\*.

Kim, J., & Maher, M. (2023). The effect of AI-based inspiration on human design ideation. *International Journal of Design Creativity and Innovation*, 11, 81 - 98. <https://doi.org/10.1080/21650349.2023.2167124>
