# Supplementary material
Source: ML conference proceedings conference paper supplement (https://openreview.net/forum?id=E2XBNokxDy)
Supplement: supplementary_material [file What_are_the_established_best_practices_and_primar.pdf › case-study/A05_Drafting_the_A4S_Paper/consensus_output/prompt_3_1/What_are_the_established_best_practices_and_primar.pdf]

# Best Practices and Primary Limitations of N-of-1 and Auto-ethnographic Methods in HCI Research

## 1. Introduction

N-of-1 and auto-ethnographic methods have become increasingly prominent in Human-Computer Interaction (HCI) research, offering unique insights into individual experiences, personalized interventions, and the nuanced interplay between humans and technology. N-of-1 methods, rooted in single-case experimental designs, allow for rigorous within-person analysis and are particularly valuable for studying heterogeneous effects, rare conditions, or personalized technology use (Porcino et al., 2020; McDonald et al., 2017; Shamseer et al., 2015; Duan et al., 2013; Gabler et al., 2011; Kwasnicka et al., 2019; Hawksworth et al., 2024; Chatters et al., 2024). Auto-ethnography, on the other hand, leverages the researcher's own lived experience to generate deep, reflexive understanding of technology adoption, design, and use, often surfacing marginalized perspectives and challenging dominant paradigms (McDonald et al., 2019; Arya, 2024; Erete et al., 2021; Lucero et al., 2021; Kaltenhauser et al., 2024; Lucero et al., 2019). Best practices for both approaches emphasize methodological transparency, reflexivity, robust data collection, and clear reporting standards (McDonald et al., 2019; Porcino et al., 2020; Shamseer et al., 2015; Lucero et al., 2021; Kaltenhauser et al., 2024; Chatters et al., 2024). However, these methods also face notable limitations, including concerns about generalizability, potential for bias, challenges in reliability and validity, and practical barriers to implementation in broader HCI contexts (McDonald et al., 2019; McDonald et al., 2017; Erete et al., 2021; Kwasnicka et al., 2019; He et al., 2021; Kaltenhauser et al., 2024; Wilmont et al., 2024; Lucero et al., 2019). This review synthesizes established best practices and primary limitations, drawing on recent systematic reviews, methodological guidelines, and empirical studies in HCI and related fields.

## 2. Methods

We searched over 170 million research papers in Consensus, including Semantic Scholar, PubMed, and other major databases, using targeted queries on N-of-1 and auto-ethnographic methods in HCI. A total of 992 papers were identified, 642 were screened, 340 were deemed eligible, and the 50 most relevant papers were included in this review.

## Search Strategy

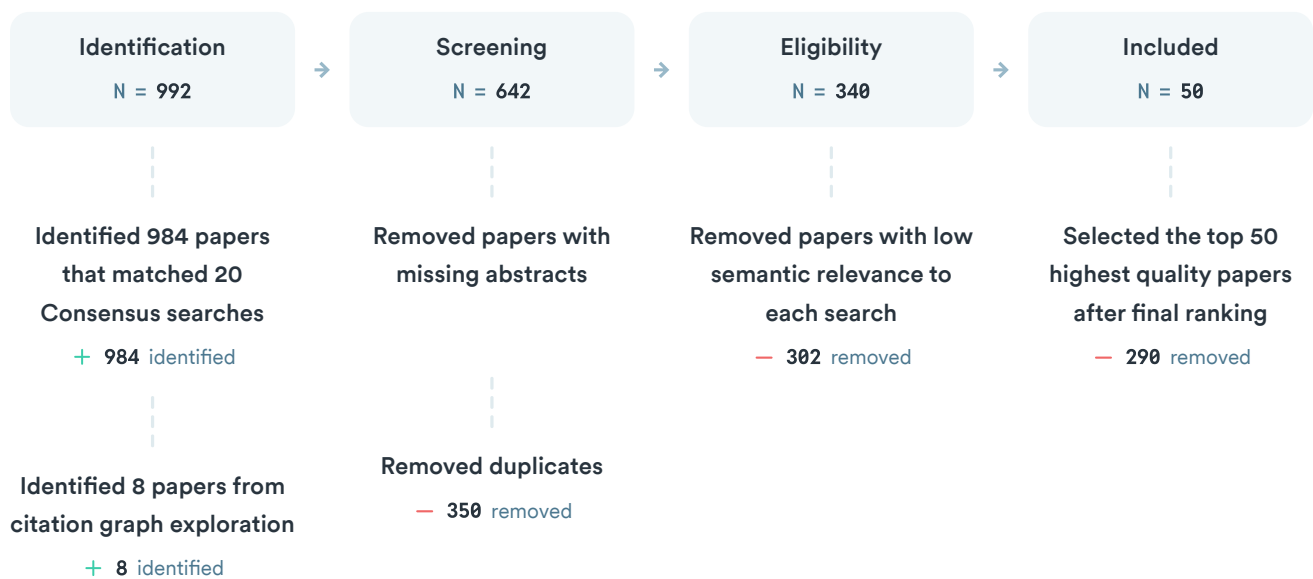

FIGURE 1 Flow diagram of the literature search and selection process.

Eight unique search groups were executed, covering foundational frameworks, best practices, limitations, interdisciplinary perspectives, and methodological diversity in N-of-1 and auto-ethnographic HCI research.

## 3. Results

### 3.1. Best Practices for N-of-1 Methods in HCI

- **Rigorous Design and Protocols:** Use randomization, blinding, and formal outcome assessment where possible to enhance internal validity (Porcino et al., 2020; Shamseer et al., 2015; Duan et al., 2013; Hawsworth et al., 2024; Chatters et al., 2024). Employ established reporting guidelines such as SPENT (SPIRIT extension for N-of-1 trials) and CENT (CONSORT extension for N-of-1 trials) to ensure transparency and completeness (Porcino et al., 2020; Shamseer et al., 2015; Chatters et al., 2024; , 2016).
- **Appropriate Statistical Analysis:** Account for serial correlation, carryover effects, and individual variability using advanced statistical models (e.g., dynamic regression, Bayesian approaches) (Vieira et al., 2017; Percha et al., 2019; Araujo et al., 2016; Shrestha & Jain, 2021; Senn, 2024; Tang & Landes, 2019; Diaz, 2021).
- **Personalization and Relevance:** Tailor interventions and measurements to the individual, leveraging digital tools and mobile health platforms for real-time, unobtrusive data collection (McDonald et al., 2017; Konigorski et al., 2020; Kravitz et al., 2020).
- **Ethical Considerations:** Ensure informed consent, participant autonomy, and clear communication of risks and benefits, especially when interventions are highly personalized (Porcino et al., 2020; Duan et al., 2013; Wilmont et al., 2024; Chatters et al., 2024).

### 3.2. Best Practices for Auto-ethnographic Methods in HCI

- **Reflexivity and Transparency:** Maintain a reflexive stance, explicitly acknowledging the researcher's positionality, biases, and influence on the research process (Mcdonald et al., 2019; Arya, 2024; Erete et al., 2021; Lucero et al., 2021; Kaltenhauser et al., 2024; Lucero et al., 2019).
- **Thick Description and Rich Data:** Provide detailed, context-rich narratives that connect personal experience to broader cultural, social, or technological phenomena (Arya, 2024; Erete et al., 2021; Lucero et al., 2021; Kaltenhauser et al., 2024).
- **Methodological Rigor:** Use systematic data collection (e.g., diaries, logs, artifacts), iterative analysis, and triangulation where possible to enhance credibility (Mcdonald et al., 2019; Lucero et al., 2021; Kaltenhauser et al., 2024).
- **Clear Reporting Standards:** Follow established guidelines for reporting auto-ethnographic work, including transparency about methods, data, and analytic choices (Mcdonald et al., 2019; Kaltenhauser et al., 2024; Lucero et al., 2019).

### 3.3. Primary Limitations of N-of-1 and Auto-ethnographic Methods

- **Generalizability:** Findings are often limited to the individual or context studied, making it difficult to generalize to broader populations (Mcdonald et al., 2019; McDonald et al., 2017; Erete et al., 2021; Kwasnicka et al., 2019; He et al., 2021; Kaltenhauser et al., 2024; Wilmont et al., 2024; Lucero et al., 2019).
- **Potential for Bias:** Researcher and participant biases can influence data collection, interpretation, and reporting, especially in auto-ethnography (Mcdonald et al., 2019; Arya, 2024; Erete et al., 2021; Lucero et al., 2021; Kaltenhauser et al., 2024; Lucero et al., 2019).
- **Reliability and Validity:** Challenges in establishing reliability (e.g., inter-rater reliability is rare in qualitative HCI research) and validity due to subjective interpretation and lack of replication (Mcdonald et al., 2019; Lucero et al., 2021; Kaltenhauser et al., 2024; Lucero et al., 2019).
- **Practical Barriers:** N-of-1 studies can be time-consuming, require specialized statistical expertise, and may face logistical challenges in recruitment and retention (McDonald et al., 2017; Kwasnicka et al., 2019; He et al., 2021; Wilmont et al., 2024; Chatters et al., 2024).
- **Ethical and Relational Issues:** Auto-ethnography may expose sensitive personal information, raising concerns about privacy, consent, and potential harm (Erete et al., 2021; Kaltenhauser et al., 2024; Lucero et al., 2019).

### 3.4. Emerging Solutions and Opportunities

- **Mixed Methods and Aggregation:** Combining N-of-1 and auto-ethnographic approaches with other qualitative or quantitative methods can enhance robustness and transferability (Van Ness et al., 2017; Perski et al., 2019).
- **Digital Platforms and Tools:** New digital platforms (e.g., StudyU) facilitate the design, conduct, and reporting of N-of-1 studies, lowering barriers to entry (Konigorski et al., 2020; Chatters et al., 2024).
- **Community and Participatory Approaches:** Engaging participants as co-researchers and leveraging community-based auto-ethnography can broaden perspectives and increase impact (Erete et al., 2021; Kaltenhauser et al., 2024; Lucero et al., 2019).

## Key Papers

| Paper                       | Methodology                | Key Focus                           | Best Practices Highlighted                                        | Limitations Discussed              |
|-----------------------------|----------------------------|-------------------------------------|-------------------------------------------------------------------|------------------------------------|
| (Porcino et al., 2020)      | SPENT guideline            | N-of-1 trials                       | Protocol transparency, stakeholder consensus, reporting standards | Implementation complexity          |
| (Shamseer et al., 2015)     | CENT guideline             | N-of-1 trials                       | Reporting completeness, checklist for transparency                | Variable reporting quality         |
| (Mcdonald et al., 2019)     | Meta-analysis & guidelines | Qualitative/auto-ethnography in HCI | Reliability, reflexivity, reporting norms                         | Rare use of IRR, subjectivity      |
| (Kaltenhauser et al., 2024) | Systematic review          | Auto-ethnography in HCI             | Data collection, thick description, reporting                     | Generalizability, bias             |
| (Chatters et al., 2024)     | Stakeholder workshop       | N-of-1 trials                       | 22 key design points, stakeholder input                           | Design and implementation barriers |

**FIGURE 2** Comparison of key studies on best practices and limitations of N-of-1 and auto-ethnographic methods in HCI.

## Top Contributors

| Type    | Name                                                        | Papers                                                                                                                |
|---------|-------------------------------------------------------------|-----------------------------------------------------------------------------------------------------------------------|
| Author  | Larissa Shamseer                                            | (Porcino et al., 2020; Shamseer et al., 2015; Porcino et al., 2017)                                                   |
| Author  | S. Vohra                                                    | (Porcino et al., 2020; Shamseer et al., 2015; Gabler et al., 2011; , 2016; Nikles et al., 2011; Kravitz et al., 2009) |
| Author  | J. Nikles                                                   | (Shamseer et al., 2015; Scuffham et al., 2010; Nikles et al., 2005)                                                   |
| Journal | <i>Trials</i>                                               | (Hawthornth et al., 2024; Chatters et al., 2024)                                                                      |
| Journal | <i>Proceedings of the ACM on Human-Computer Interaction</i> | (Mcdonald et al., 2019; Erete et al., 2021)                                                                           |
| Journal | <i>Health Psychology Review</i>                             | (McDonald et al., 2017; Vieira et al., 2017; Kwasnicka et al., 2019)                                                  |

**FIGURE 3** Authors & journals that appeared most frequently in the included papers.

## 4. Discussion

N-of-1 and auto-ethnographic methods offer powerful tools for advancing personalized, context-rich, and reflexive research in HCI. The adoption of standardized guidelines (e.g., SPENT, CENT) and best practices around transparency, reflexivity, and methodological rigor has improved the quality and credibility of these approaches (Mcdonald et al., 2019; Porcino et al., 2020; Shamseer et al., 2015; Kaltenhauser et al., 2024; Chatters et al., 2024). However, persistent limitations—such as limited generalizability, potential for bias, and practical barriers—underscore the need for careful design, clear reporting, and critical reflection (Mcdonald et al., 2019; McDonald et al., 2017; Erete et al., 2021; Kwasnicka et al., 2019; Kaltenhauser et al., 2024; Wilmont et al., 2024; Lucero et al., 2019). The field is moving toward greater methodological pluralism, with mixed methods, digital platforms, and participatory approaches offering promising avenues to address these challenges (Konigorski et al., 2020; Chatters et al., 2024; Van Ness et al., 2017; Perski et al., 2019). Ultimately, the value of N-of-1 and auto-ethnographic research in HCI lies in their ability to surface individual and marginalized experiences, inform personalized interventions, and challenge dominant narratives—provided their limitations are acknowledged and addressed.

## Claims and Evidence Table

| Claim                                                                                                   | Evidence Strength                                                                               | Reasoning                                                                                          | Papers                                                                                                                                                                            |
|---------------------------------------------------------------------------------------------------------|-------------------------------------------------------------------------------------------------|----------------------------------------------------------------------------------------------------|-----------------------------------------------------------------------------------------------------------------------------------------------------------------------------------|
| Standardized guidelines (SPENT, CENT) improve transparency and rigor in N-of-1 trials                   | <br>Strong     | Widely adopted, consensus-based guidelines with demonstrated impact on reporting quality           | (Porcino et al., 2020; Shamseer et al., 2015; Chatters et al., 2024; , 2016)                                                                                                      |
| Reflexivity and thick description are essential for credible auto-ethnography in HCI                    | <br>Strong     | Systematic reviews and methodological papers emphasize reflexivity and rich data as core strengths | (Mcdonald et al., 2019; Arya, 2024; Erete et al., 2021; Lucero et al., 2021; Kaltenhauser et al., 2024; Lucero et al., 2019)                                                      |
| Generalizability is a primary limitation of both N-of-1 and auto-ethnographic methods                   | <br>Moderate   | Multiple reviews and empirical studies highlight limited transferability of findings               | (Mcdonald et al., 2019; McDonald et al., 2017; Erete et al., 2021; Kwasnicka et al., 2019; He et al., 2021; Kaltenhauser et al., 2024; Wilmont et al., 2024; Lucero et al., 2019) |
| Reliability and validity are challenging to establish, especially in qualitative/auto-ethnographic work | <br>Moderate | IRR is rare; subjectivity and lack of replication are common concerns                              | (Mcdonald et al., 2019; Lucero et al., 2021; Kaltenhauser et al., 2024; Lucero et al., 2019)                                                                                      |
| Digital tools and mixed methods can help address some limitations                                       | <br>Moderate | Emerging platforms and methodological pluralism show promise for enhancing robustness              | (Konigorski et al., 2020; Chatters et al., 2024; Van Ness et al., 2017; Perski et al., 2019)                                                                                      |
| Ethical and practical barriers (e.g., privacy, time, expertise) remain significant                      | <br>Moderate | Stakeholder input and qualitative studies highlight ongoing challenges                             | (Erete et al., 2021; Kwasnicka et al., 2019; Kaltenhauser et al., 2024; Wilmont et al., 2024; Chatters et al., 2024; Lucero et al., 2019)                                         |

**FIGURE 4** Key claims and support evidence identified in these papers.

## 5. Conclusion

N-of-1 and auto-ethnographic methods are valuable for advancing personalized, reflexive, and context-sensitive research in HCI, but require careful attention to methodological rigor, transparency, and ethical considerations to address their inherent limitations.

## 5.1. Research Gaps

Key gaps include the need for more robust strategies to enhance generalizability, improved methods for establishing reliability and validity, and greater integration of digital tools and participatory approaches.

### Research Gaps Matrix

| Method/Focus     | Generalizability | Reliability/Validity | Digital Tools | Mixed Methods | Participatory Design |
|------------------|------------------|----------------------|---------------|---------------|----------------------|
| N-of-1 Trials    | 7                | 6                    | 4             | 5             | 2                    |
| Auto-ethnography | 8                | 7                    | 3             | 4             | 3                    |

**FIGURE 5** Heatmap of research coverage by method and study attribute.

## 5.2. Open Research Questions

Future research should focus on enhancing generalizability, developing robust reliability/validity strategies, and leveraging digital and participatory methods to strengthen N-of-1 and auto-ethnographic research in HCI.

| Question                                                                                                                                   | Why                                                                                                  |
|--------------------------------------------------------------------------------------------------------------------------------------------|------------------------------------------------------------------------------------------------------|
| How can findings from N-of-1 and auto-ethnographic studies be synthesized or generalized to inform broader HCI practice?                   | Addressing this would increase the impact and applicability of individualized research in the field. |
| What new strategies can improve reliability and validity in auto-ethnographic and first-person HCI research?                               | Enhancing rigor will strengthen the credibility and acceptance of these methods.                     |
| How can digital platforms and participatory approaches be leveraged to scale and democratize N-of-1 and auto-ethnographic research in HCI? | This could lower barriers, increase inclusivity, and improve methodological robustness.              |

**FIGURE 6** Open research questions and their significance for future work.

In summary, while N-of-1 and auto-ethnographic methods offer unique strengths for HCI research, addressing their limitations through methodological innovation and critical reflection is essential for maximizing their value and impact.

*These papers were sourced and synthesized using Consensus, an AI-powered search engine for research. Try it at <https://consensus.app>*

## References

Mcdonald, N., Schoenebeck, S., & Forte, A. (2019). Reliability and Inter-rater Reliability in Qualitative Research. *Proceedings of the ACM on Human-Computer Interaction*, 3, 1 - 23. <https://doi.org/10.1145/3359174>

Porcino, A., Shamseer, L., Chan, A., Kravitz, R., Orkin, A., Punja, S., Ravaud, P., Schmid, C., & Vohra, S. (2020). SPIRIT extension and elaboration for n-of-1 trials: SPENT 2019 checklist. *BMJ*, 368.

<https://doi.org/10.1136/bmj.m122>

McDonald, S., Quinn, F., Vieira, R., O'Brien, N., White, M., Johnston, D., & Sniehotta, F. (2017). The state of the art and future opportunities for using longitudinal n-of-1 methods in health behaviour research: a systematic literature overview. *Health Psychology Review*, 11, 307 - 323. <https://doi.org/10.1080/17437199.2017.1316672>

Shamseer, L., Sampson, M., Bukutu, C., Schmid, C., Nikles, J., Tate, R., Johnston, B., Zucker, D., Shadish, W., Kravitz, R., Guyatt, G., Altman, D., Moher, D., & Vohra, S. (2015). CONSORT extension for reporting N-of-1 trials (CENT) 2015: Explanation and elaboration. *BMJ : British Medical Journal*, 350. <https://doi.org/10.1136/bmj.h1793>

Vieira, R., McDonald, S., Araújo-Soares, V., Sniehotta, F., & Henderson, R. (2017). Dynamic modelling of n-of-1 data: powerful and flexible data analytics applied to individualised studies. *Health Psychology Review*, 11, 222 - 234.

<https://doi.org/10.1080/17437199.2017.1343680>

Percha, B., Baskerville, E., Johnson, M., Dudley, J., & Zimmerman, N. (2019). Designing Robust N-of-1 Studies for Precision Medicine: Simulation Study and Design Recommendations. *Journal of Medical Internet Research*, 21.

<https://doi.org/10.2196/12641>

Araujo, A., Julious, S., & Senn, S. (2016). Understanding Variation in Sets of N-of-1 Trials. *PLoS ONE*, 11.

<https://doi.org/10.1371/journal.pone.0167167>

Arya, A. (2024). Through the Waves: An Auto-ethnographic Perspective on HCI Design and Research. \*\*, 3-15.

[https://doi.org/10.1007/978-3-031-60405-8\\_1](https://doi.org/10.1007/978-3-031-60405-8_1)

Shrestha, S., & Jain, S. (2021). A Bayesian-bandit adaptive design for N-of-1 clinical trials. *Statistics in Medicine*, 40, 1825 - 1844. <https://doi.org/10.1002/sim.8873>

Erete, S., Rankin, Y., & Thomas, J. (2021). I Can't Breathe. *Proceedings of the ACM on Human-Computer Interaction*, 4, 1 - 23. <https://doi.org/10.1145/3432933>

Lucero, A., Desjardins, A., & Neustaedter, C. (2021). Longitudinal First-Person HCI Research Methods. *Human-Computer Interaction Series*. [https://doi.org/10.1007/978-3-030-67322-2\\_5](https://doi.org/10.1007/978-3-030-67322-2_5)

Duan, N., Kravitz, R., & Schmid, C. (2013). Single-patient (n-of-1) trials: a pragmatic clinical decision methodology for patient-centered comparative effectiveness research.. *Journal of clinical epidemiology*, 66 8 Suppl, S21-8.

<https://doi.org/10.1016/j.jclinepi.2013.04.006>

Gabler, N., Duan, N., Vohra, S., & Kravitz, R. (2011). N-of-1 Trials in the Medical Literature: A Systematic Review. *Medical Care*, 49, 761-768. <https://doi.org/10.1097/MLR.0b013e318215d90d>

Konigorski, S., Wernicke, S., Slosarek, T., Zenner, A., Strelow, N., Ruether, F., Henschel, F., Manaswini, M., Pottbäcker, F., Edelman, J., Owoyele, B., Danieletto, M., Golden, E., Zweig, M., Nadkarni, G., & Böttinger, E. (2020). StudyU: A Platform for Designing and Conducting Innovative Digital N-of-1 Trials. *Journal of Medical Internet Research*, 24. <https://doi.org/10.2196/35884>

Kwasnicka, D., Kwasnicka, D., Inauen, J., Nieuwenboom, W., Nurmi, J., Nurmi, J., Schneider, A., Short, C., Dekkers, T., Williams, A., Bierbauer, W., Haukkala, A., Picariello, F., & Naughton, F. (2019). Challenges and solutions for N-of-1 design studies in health psychology. *Health Psychology Review*, 13, 163 - 178.

<https://doi.org/10.1080/17437199.2018.1564627>

He, W., Cui, Z., Chen, Y., Wang, F., & Li, F. (2021). Status of N-of-1 Trials in Chronic Pain Management: A Narrative Review. *Pain and Therapy*, 10, 1013 - 1028. <https://doi.org/10.1007/s40122-021-00314-4>



Senn, S. (2024). The analysis of continuous data from n-of-1 trials using paired cycles: a simple tutorial. *Trials*, 25. <https://doi.org/10.1186/s13063-024-07964-7>

Kaltenhauser, A., Stefanidi, E., & Schöning, J. (2024). Playing with Perspectives and Unveiling the Autoethnographic Kaleidoscope in HCI – A Literature Review of Autoethnographies. *Proceedings of the 2024 CHI Conference on Human Factors in Computing Systems*. <https://doi.org/10.1145/3613904.3642355>

Tang, J., & Landes, R. (2019). Some t-tests for N-of-1 trials with serial correlation. *PLoS ONE*, 15. <https://doi.org/10.1371/journal.pone.0228077>

Hawthornth, O., Chatters, R., Julious, S., Cook, A., Biggs, K., Solaiman, K., Quah, M., & Cheong, S. (2024). A methodological review of randomised n-of-1 trials. *Trials*, 25. <https://doi.org/10.1186/s13063-024-08100-1>

Wilmont, I., Loeffen, M., & Hoozeboom, T. (2024). A qualitative study on the facilitators and barriers to adopting the N-of-1 trial methodology as part of clinical practice: potential versus implementation challenges. *International Journal of Qualitative Studies on Health and Well-being*, 19. <https://doi.org/10.1080/17482631.2024.2318810>

Chatters, R., Hawthornth, O., Julious, S., & Cook, A. (2024). The development of a set of key points to aid clinicians and researchers in designing and conducting n-of-1 trials. *Trials*, 25. <https://doi.org/10.1186/s13063-024-08261-z>

Diaz, F. (2021). Using population crossover trials to improve the decision process regarding treatment individualization in N-of-1 trials. *Statistics in Medicine*, 40, 4345 - 4361. <https://doi.org/10.1002/sim.9030>

(2016). CONSORT extension for reporting N-of-1 trials (CENT) 2015 Statement. *The BMJ*, 355. <https://doi.org/10.1136/bmj.i5381>

Scuffham, P., Nikles, J., Mitchell, G., Yelland, M., Vine, N., Poulos, C., Pillans, P., Bashford, G., Del Mar, C., Schluter, P., & Glasziou, P. (2010). Using N-of-1 Trials to Improve Patient Management and Save Costs. *Journal of General Internal Medicine*, 25, 906-913. <https://doi.org/10.1007/s11606-010-1352-7>

Nikles, J., Mitchell, G., Schluter, P., Good, P., Hardy, J., Rowett, D., Shelby-James, T., Vohra, S., & Currow, D. (2011). Aggregating single patient (n-of-1) trials in populations where recruitment and retention was difficult: the case of palliative care.. *Journal of clinical epidemiology*, 64 5, 471-80. <https://doi.org/10.1016/j.jclinepi.2010.05.009>

Lucero, A., Desjardins, A., Neustaedter, C., Höök, K., Hassenzahl, M., & Cecchinato, M. (2019). A Sample of One: First-Person Research Methods in HCI. *Companion Publication of the 2019 on Designing Interactive Systems Conference 2019 Companion*. <https://doi.org/10.1145/3301019.3319996>

Van Ness, P., Murphy, T., & Ali, A. (2017). Attention to Individuals: Mixed Methods for N-of-1 Health Care Interventions. *Journal of Mixed Methods Research*, 11, 342 - 354. <https://doi.org/10.1177/1558689815623685>

Porcino, A., Punja, S., Chan, A., Kravitz, R., Orkin, A., Ravaud, P., Schmid, C., & Vohra, S. (2017). Protocol for a systematic review of N-of-1 trial protocol guidelines and protocol reporting guidelines. *Systematic Reviews*, 6. <https://doi.org/10.1186/s13643-017-0525-4>

Kravitz, R., Aguilera, A., Chen, E., Choi, Y., Hekler, E., Karr, C., Kim, K., Phatak, S., Sarkar, S., Schueller, S., Sim, I., Yang, J., & Schmid, C. (2020). Feasibility, Acceptability, and Influence of mHealth-Supported N-of-1 Trials for Enhanced Cognitive and Emotional Well-Being in US Volunteers. *Frontiers in Public Health*, 8. <https://doi.org/10.3389/fpubh.2020.00260>

Nikles, J., Clavarino, A., & Mar, C. (2005). Using n-of-1 trials as a clinical tool to improve prescribing.. *The British journal of general practice : the journal of the Royal College of General Practitioners*, 55 512, 175-80.

Perski, O., Naughton, F., Garnett, C., Blandford, A., Beard, E., West, R., & Michie, S. (2019). Do Daily Fluctuations in Psychological and App-Related Variables Predict Engagement With an Alcohol Reduction App? A Series of N-Of-1 Studies. *JMIR mHealth and uHealth*, 7. <https://doi.org/10.2196/14098>

Kravitz, R., Paterniti, D., Hay, M., Subramanian, S., Dean, D., Weisner, T., Vohra, S., & Duan, N. (2009). Marketing therapeutic precision: Potential facilitators and barriers to adoption of n-of-1 trials.. *Contemporary clinical trials*, 30 5, 436-45. <https://doi.org/10.1016/j.cct.2009.04.001>
