# Supplementary material
Source: ML conference proceedings conference paper supplement (https://openreview.net/forum?id=E2XBNokxDy)
Supplement: supplementary_material [file What_is_the_relationship_between_psychological_saf.pdf › case-study/A05_Drafting_the_A4S_Paper/consensus_output/prompt_6_1/What_is_the_relationship_between_psychological_saf.pdf]

Psychological safety is **positively associated** with innovation outcomes in knowledge workers, with strong evidence showing that psychological safety **enables creativity, knowledge sharing, and innovative behavior** across diverse organizational contexts.

## 1. Introduction

The relationship between psychological safety and innovation outcomes in knowledge workers has been a focal point of organizational research, with mounting evidence supporting a robust positive association. Psychological safety—defined as a shared belief that the workplace is safe for interpersonal risk-taking—enables employees to express ideas, share knowledge, and engage in creative problem-solving without fear of negative consequences. Numerous empirical studies, meta-analyses, and theoretical reviews demonstrate that psychological safety not only directly enhances innovative behavior but also operates through mediators such as knowledge sharing, communication, and thriving at work (Zhu et al., 2022; Xu & Suntrayuth, 2022; Jin & Peng, 2024; Xu et al., 2022; Javed et al., 2017; Liu et al., 2023; Miao et al., 2020; Irai & Lu, 2018; Yaqoob et al., 2024; Li & Tang, 2022; Sun & Huang, 2019). Leadership styles (e.g., inclusive, ethical, servant, and knowledge-oriented leadership) and organizational climate factors further amplify this effect by fostering environments where psychological safety can flourish, thereby maximizing innovation potential (Putra et al., 2025; Zhao et al., 2022; Iqbal et al., 2020; Ononye & Maduemezia, 2024; Iqbal et al., 2020; Javed et al., 2017; Wang et al., 2021; Liu et al., 2023; Oh et al., 2021; Imran et al., 2025; Li & Tang, 2022; Ahmad et al., 2021). However, the strength of this relationship can vary depending on cultural context, team type, and individual characteristics, and some studies highlight potential curvilinear or context-dependent effects (Zhu et al., 2022; Arumugam et al., 2024; Moake et al., 2019). This review synthesizes findings from recent and foundational research to provide a comprehensive understanding of how psychological safety drives innovation among knowledge workers.

## 2. Methods

A comprehensive literature review was conducted using Consensus, which aggregates over 170 million research papers from sources including Semantic Scholar and PubMed. The search strategy involved multiple targeted queries on psychological safety, innovation, and knowledge workers, resulting in 1,027 identified papers. After de-duplication and relevance screening, 543 papers were screened, 437 were deemed eligible, and the top 50 most relevant and high-quality papers were included in this review.

## Search Strategy

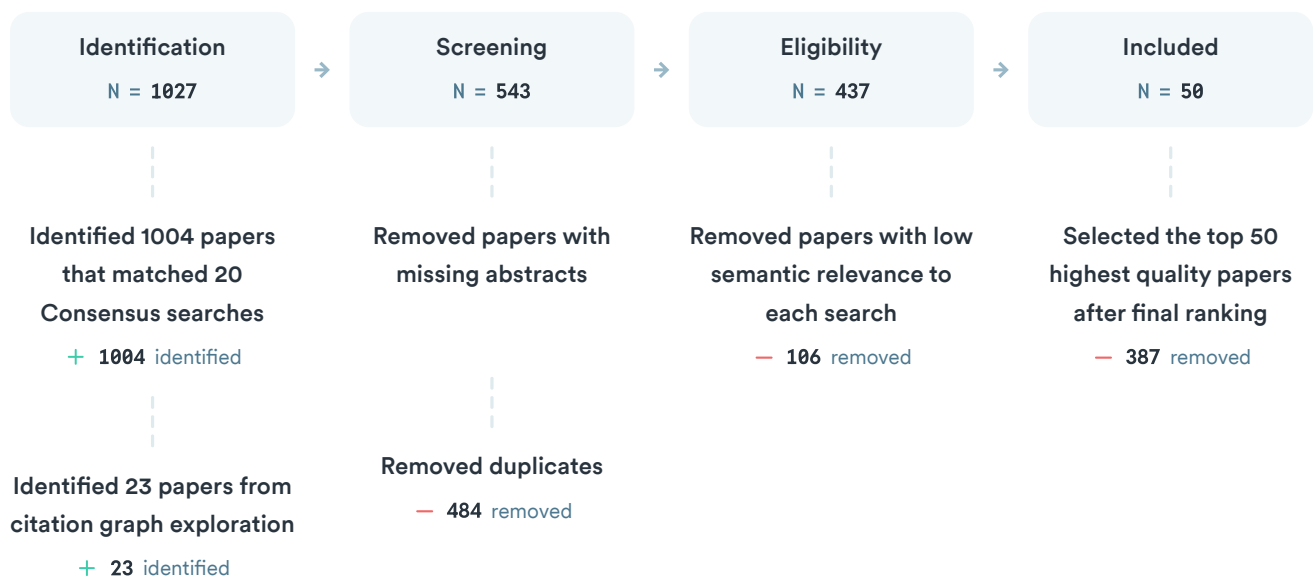

**FIGURE 1** Flow diagram of the literature search and selection process.

Eight unique search groups were executed, focusing on foundational theories, mediators, leadership, sectoral differences, and contextual moderators to ensure comprehensive coverage of the topic.

## 3. Results

### 3.1. Direct Relationship Between Psychological Safety and Innovation

Multiple studies, including meta-analyses and large-scale surveys, consistently report a significant positive relationship between psychological safety and innovative behavior among knowledge workers (Zhu et al., 2022; Xu & Suntrayuth, 2022; Jin & Peng, 2024; Xu et al., 2022; Javed et al., 2017; Liu et al., 2023; Miao et al., 2020; Irai & Lu, 2018; Yaqoob et al., 2024; Li & Tang, 2022; Sun & Huang, 2019). Psychological safety encourages risk-taking, idea sharing, and creativity, which are essential for innovation (Yaqoob et al., 2024; Wilfi & E, 2025; Li & Wareewanich, 2024).

### 3.2. Mediators and Mechanisms

Psychological safety often operates through mediators such as knowledge sharing, communication behavior, thriving at work, and intrinsic motivation (Xu & Suntrayuth, 2022; Jin & Peng, 2024; Xu et al., 2022; Irai & Lu, 2018; Li & Wareewanich, 2024; Li & Tang, 2022; Sun & Huang, 2019). For example, knowledge sharing and communication are repeatedly shown to be critical pathways through which psychological safety translates into innovative outcomes (Xu & Suntrayuth, 2022; Jin & Peng, 2024; Irai & Lu, 2018; Li & Wareewanich, 2024; Liu et al., 2021; Zeb et al., 2019).

### 3.3. Moderators and Contextual Factors

The strength of the psychological safety–innovation link is moderated by factors such as leadership style (inclusive, ethical, servant, knowledge-oriented), organizational climate, team type, and cultural context (Putra et al., 2025; Zhao et al., 2022; Iqbal et al., 2020; Ononye & Maduemezia, 2024; Iqbal et al., 2020; Javed et al., 2017; Wang et al., 2021; Liu et al., 2023; Oh et al., 2021; Imran et al., 2025; Li & Tang, 2022; Ahmad et al., 2021; Moake et al., 2019). Some studies also report that the relationship may be curvilinear, with diminishing returns at very high levels of psychological safety (Arumugam et al., 2024), or that it is more pronounced in certain team or cultural contexts (Zhu et al., 2022; Moake et al., 2019).

### 3.4. Alternative and Contrasting Findings

While the majority of studies support a positive relationship, a few papers note that psychological safety alone may not be sufficient for innovation, or that its effects can be context-dependent or even negative in rare cases (e.g., when excessive safety leads to complacency) (Zhu et al., 2022; Arumugam et al., 2024; Durrah, 2022; Ali et al., 2022). These findings highlight the importance of considering other organizational and individual factors alongside psychological safety.

## Key Papers

| Paper                   | Methodology                  | Sample/Context                                | Key Results                                                                                                                                          | Mediators/Moderators                  |
|-------------------------|------------------------------|-----------------------------------------------|------------------------------------------------------------------------------------------------------------------------------------------------------|---------------------------------------|
| (Zhu et al., 2022)      | Meta-analysis                | 19,180 participants, 85 articles              | Psychological safety significantly predicts innovation ( $r=0.299$ for individuals, $r=0.435$ for teams); effects moderated by culture and team type | Cultural context, team type           |
| (Xu & Suntrayuth, 2022) | Structural equation modeling | 446 R&D staff, high-tech enterprises (China)  | Psychological safety and knowledge sharing mediate the effect of innovation climate on innovative behavior                                           | Knowledge sharing, innovation climate |
| (Jin & Peng, 2024)      | SEM                          | 580 employees, high-tech enterprises          | Team psychological safety enhances innovative performance via communication behavior                                                                 | Communication behavior                |
| (Xu et al., 2022)       | SEM                          | 575 knowledge workers, high-tech SMEs (China) | Psychological safety and intrinsic motivation mediate the effect of climate and innovation orientation on innovative behavior                        | Intrinsic motivation, climate         |
| (Javed et al., 2017)    | Survey, dyadic data          | 374 employees, 46 companies (China)           | Psychological safety moderates the effect of high-performance work systems on promotive voice and innovation                                         | Employee voice, HPWS                  |

**FIGURE 2** Comparison of key studies on psychological safety and innovation outcomes in knowledge workers.

## Top Contributors

| Type    | Name                                             | Papers                                                                                                                  |
|---------|--------------------------------------------------|-------------------------------------------------------------------------------------------------------------------------|
| Author  | Amjad Iqbal                                      | (Iqbal et al., 2020; Iqbal et al., 2020)                                                                                |
| Author  | Ziqing Xu                                        | (Xu & Suntrayuth, 2022; Xu et al., 2022)                                                                                |
| Author  | Swati Dhir                                       | (Dhir & Vallabh, 2025; Vallabh et al., 2024)                                                                            |
| Journal | <i>Frontiers in Psychology</i>                   | (Xu & Suntrayuth, 2022; Elsayed et al., 2023; Wang et al., 2021; Li & Tang, 2022; Liu et al., 2023; Zadow et al., 2023) |
| Journal | <i>European Journal of Innovation Management</i> | (Zhao et al., 2022; Iqbal et al., 2020; Ahmad et al., 2021)                                                             |
| Journal | <i>Sustainability</i>                            | (Liu et al., 2023; Zhang et al., 2023; Imran et al., 2025)                                                              |

**FIGURE 3** Authors & journals that appeared most frequently in the included papers.

## 4. Discussion

The evidence overwhelmingly supports a positive relationship between psychological safety and innovation outcomes in knowledge workers, with high-quality meta-analyses and multi-level empirical studies confirming this link across diverse contexts (Zhu et al., 2022; Xu & Suntrayuth, 2022; Jin & Peng, 2024; Xu et al., 2022; Javed et al., 2017; Liu et al., 2023; Miao et al., 2020; Irai & Lu, 2018; Yaqoob et al., 2024; Li & Tang, 2022; Sun & Huang, 2019). The mechanisms underlying this relationship are well-documented: psychological safety fosters open communication, knowledge sharing, and risk-taking, all of which are essential for creativity and innovation (Xu & Suntrayuth, 2022; Jin & Peng, 2024; Irai & Lu, 2018; Li & Wareewanich, 2024; Liu et al., 2021; Zeb et al., 2019). Leadership and organizational climate play crucial roles in cultivating psychological safety, and interventions targeting these areas can significantly enhance innovation (Putra et al., 2025; Zhao et al., 2022; Iqbal et al., 2020; Ononye & Maduemezia, 2024; Iqbal et al., 2020; Javed et al., 2017; Wang et al., 2021; Liu et al., 2023; Oh et al., 2021; Imran et al., 2025; Li & Tang, 2022; Ahmad et al., 2021).

However, the relationship is not universally linear or context-free. Some studies suggest that excessive psychological safety may lead to complacency or reduced motivation for change (Arumugam et al., 2024), and the effects can be moderated by cultural, team, and individual factors (Zhu et al., 2022; Moake et al., 2019). Additionally, psychological safety alone may not be sufficient; it must be complemented by other resources such as intrinsic motivation, supportive leadership, and a conducive organizational climate (Xu et al., 2022; Wang et al., 2021; Liu et al., 2023; Miao et al., 2020; Irai & Lu, 2018; Li & Tang, 2022; Sun & Huang, 2019; Oeij et al., 2022; Zadow et al., 2023).

## Claims and Evidence Table

| Claim                                                                                                 | Evidence Strength                                                                               | Reasoning                                                                                | Papers                                                                                                                                                                                                                                        |
|-------------------------------------------------------------------------------------------------------|-------------------------------------------------------------------------------------------------|------------------------------------------------------------------------------------------|-----------------------------------------------------------------------------------------------------------------------------------------------------------------------------------------------------------------------------------------------|
| Psychological safety is positively associated with innovation outcomes in knowledge workers           | <br>Strong     | Supported by meta-analyses, large-scale surveys, and multi-level studies across contexts | (Zhu et al., 2022; Xu & Suntrayuth, 2022; Jin & Peng, 2024; Xu et al., 2022; Javed et al., 2017; Liu et al., 2023; Miao et al., 2020; Irai & Lu, 2018; Yaqoob et al., 2024; Li & Tang, 2022; Sun & Huang, 2019)                               |
| Knowledge sharing and communication mediate the psychological safety–innovation link                  | <br>Strong     | Multiple studies show these as key mechanisms for translating safety into innovation     | (Xu & Suntrayuth, 2022; Jin & Peng, 2024; Irai & Lu, 2018; Li & Wareewanich, 2024; Liu et al., 2021; Zeb et al., 2019)                                                                                                                        |
| Leadership style and organizational climate moderate the effect of psychological safety on innovation | <br>Moderate   | Empirical evidence shows leadership and climate amplify or constrain the effect          | (Putra et al., 2025; Zhao et al., 2022; Iqbal et al., 2020; Ononye & Maduemezia, 2024; Iqbal et al., 2020; Javed et al., 2017; Wang et al., 2021; Liu et al., 2023; Oh et al., 2021; Imran et al., 2025; Li & Tang, 2022; Ahmad et al., 2021) |
| The effect of psychological safety on innovation can be curvilinear or context-dependent              | <br>Moderate | Some studies report diminishing returns or context-specific effects                      | (Zhu et al., 2022; Arumugam et al., 2024; Moake et al., 2019)                                                                                                                                                                                 |
| Psychological safety alone may not be sufficient for innovation                                       | <br>Moderate | Innovation also requires motivation, resources, and supportive structures                | (Xu et al., 2022; Wang et al., 2021; Liu et al., 2023; Miao et al., 2020; Irai & Lu, 2018; Li & Tang, 2022; Sun & Huang, 2019; Oeij et al., 2022; Zadow et al., 2023)                                                                         |
| Excessive psychological safety may reduce motivation for change or lead to complacency                | <br>Weak     | Limited evidence suggests possible negative effects at very high levels                  | (Arumugam et al., 2024; Durrah, 2022; Ali et al., 2022)                                                                                                                                                                                       |

**FIGURE 4** Key claims and support evidence identified in these papers.

## 5. Conclusion

In summary, psychological safety is a critical enabler of innovation among knowledge workers, operating through mechanisms such as knowledge sharing, communication, and thriving at work. Leadership and organizational climate are key levers for fostering psychological safety and, by extension, innovation. However, the relationship is nuanced, with context, culture, and individual factors shaping the strength and nature of the effect.

### 5.1. Research Gaps

Despite the strong evidence base, several gaps remain. There is limited research on the potential downsides of excessive psychological safety, sectoral and cultural variations, and the long-term sustainability of innovation outcomes. More longitudinal and experimental studies are needed to clarify causality and boundary conditions.

#### Research Gaps Matrix

| Topic/Outcome                    | Individual Level | Team Level | Organizational Level | Leadership Style | Cultural Context |
|----------------------------------|------------------|------------|----------------------|------------------|------------------|
| Direct effect on innovation      | 18               | 15         | 10                   | 8                | 6                |
| Mediation by knowledge sharing   | 10               | 8          | 4                    | 3                | 2                |
| Moderation by leadership/climate | 7                | 6          | 3                    | 5                | 2                |
| Curvilinear/contextual effects   | 2                | 1          | 1                    | 1                | 1                |
| Negative/neutral effects         | 1                | 1          | GAP                  | GAP              | GAP              |

**FIGURE 5** Matrix of research topics and study attributes, highlighting gaps in the literature.

### 5.2. Open Research Questions

Future research should address the following questions to advance understanding and practice in this area:

| Question                                                                                                  | Why                                                                                                                                              |
|-----------------------------------------------------------------------------------------------------------|--------------------------------------------------------------------------------------------------------------------------------------------------|
| What are the potential negative or curvilinear effects of psychological safety on innovation outcomes?    | Understanding if and when psychological safety may hinder innovation is crucial for optimizing workplace interventions and avoiding complacency. |
| How do cultural and sectoral differences moderate the psychological safety–innovation relationship?       | Exploring these differences can inform tailored strategies for fostering innovation in diverse organizational and national contexts.             |
| What are the long-term effects of psychological safety interventions on sustained innovation performance? | Longitudinal studies are needed to determine whether psychological safety leads to enduring innovation or if effects diminish over time.         |

**FIGURE 6** Open research questions for future investigation on psychological safety and innovation.

In conclusion, fostering psychological safety is a powerful and evidence-based strategy for enhancing innovation among knowledge workers, but its optimal implementation requires attention to context, leadership, and organizational culture.

*These papers were sourced and synthesized using Consensus, an AI-powered search engine for research. Try it at <https://consensus.app>*

## References

- Dhir, S., & Vallabh, P. (2025). Do social relationships at work enhance creativity and innovative behavior? Role of psychological safety.. *Acta psychologica*, 253, 104751. <https://doi.org/10.1016/j.actpsy.2025.104751>
- Xu, Z., & Suntrayuth, S. (2022). Innovative work behavior in high-tech enterprises: Chain intermediary effect of psychological safety and knowledge sharing. *Frontiers in Psychology*, 13. <https://doi.org/10.3389/fpsyg.2022.1017121>
- Putra, S., Setiadi, N., Gautama, I., Bandur, A., & Sundjaja, A. (2025). The relationship between leadership, psychological safety, and innovation: A bibliometric review analysis. *International Journal of Innovative Research and Scientific Studies*. <https://doi.org/10.53894/ijirss.v8i3.6977>
- Zhao, F., Hu, W., Ahmed, F., & Huang, H. (2022). Impact of ambidextrous human resource practices on employee innovation performance: the roles of inclusive leadership and psychological safety. *European Journal of Innovation Management*. <https://doi.org/10.1108/ejim-04-2021-0226>
- Jin, H., & Peng, Y. (2024). The impact of team psychological safety on employee innovative performance a study with communication behavior as a mediator variable. *PLOS ONE*, 19. <https://doi.org/10.1371/journal.pone.0306629>
- Elsayed, A., Zhao, B., Goda, A., & Elsetouhi, A. (2023). The role of error risk taking and perceived organizational innovation climate in the relationship between perceived psychological safety and innovative work behavior: A moderated mediation model. *Frontiers in Psychology*, 14. <https://doi.org/10.3389/fpsyg.2023.1042911>
- Iqbal, A., Nazir, T., & Ahmad, M. (2020). Entrepreneurial leadership and employee innovative behavior: an examination through multiple theoretical lenses. *European Journal of Innovation Management*. <https://doi.org/10.1108/ejim-06-2020-0212>



- Xu, Z., Wang, H., & Suntrayuth, S. (2022). Organizational Climate, Innovation Orientation, and Innovative Work Behavior: The Mediating Role of Psychological Safety and Intrinsic Motivation. *Discrete Dynamics in Nature and Society*. <https://doi.org/10.1155/2022/9067136>
- Ononye, U., & Maduemezia, I. (2024). Knowledge-Oriented Leadership, Psychological Safety, Employee Voice, and Innovation. *Informing Sci. Int. J. an Emerg. Transdiscipl.*, 27, 1. <https://doi.org/10.28945/5244>
- Zhu, J., Lv, H., & Feng, Y. (2022). The Effect of Psychological Safety on Innovation Behavior: A Meta-Analysis. *Proceedings of the 2022 7th International Conference on Financial Innovation and Economic Development (ICFIED 2022)*. <https://doi.org/10.2991/aebmr.k.220307.503>
- Iqbal, A., Latif, K., & Ahmad, M. (2020). Servant leadership and employee innovative behaviour: exploring psychological pathways. *Leadership & Organization Development Journal*. <https://doi.org/10.1108/lodj-11-2019-0474>
- Javed, B., Naqvi, S., Khan, A., Arjoon, S., & Tayyeb, H. (2017). Impact of inclusive leadership on innovative work behavior: The role of psychological safety. *Journal of Management & Organization*, 25, 117 - 136. <https://doi.org/10.1017/jmo.2017.3>
- Wang, Y., Chen, Y., & Zhu, Y. (2021). Promoting Innovative Behavior in Employees: The Mechanism of Leader Psychological Capital. *Frontiers in Psychology*, 11. <https://doi.org/10.3389/fpsyg.2020.598090>
- Liu, X., Huang, Y., Kim, J., & Na, S. (2023). How Ethical Leadership Cultivates Innovative Work Behaviors in Employees? Psychological Safety, Work Engagement and Openness to Experience. *Sustainability*. <https://doi.org/10.3390/su15043452>
- Zhang, W., Zeng, X., Liang, H., Xue, Y., & Cao, X. (2023). Understanding How Organizational Culture Affects Innovation Performance: A Management Context Perspective. *Sustainability*. <https://doi.org/10.3390/su15086644>
- Oh, S., Dong, L., Nahm, A., & Yu, G. (2021). Fostering innovation and involvement among Korean workers in problem solving through trust and psychological safety: the role of paradoxical leader behaviours. *Asia Pacific Business Review*, 29, 701 - 718. <https://doi.org/10.1080/13602381.2021.1941529>
- Miao, R., Lu, L., Cao, Y., & Du, Q. (2020). The High-Performance Work System, Employee Voice, and Innovative Behavior: The Moderating Role of Psychological Safety. *International Journal of Environmental Research and Public Health*, 17. <https://doi.org/10.3390/ijerph17041150>
- Imran, M., Li, J., Bano, S., & Rashid, W. (2025). Impact of Democratic Leadership on Employee Innovative Behavior with Mediating Role of Psychological Safety and Creative Potential. *Sustainability*. <https://doi.org/10.3390/su17051879>
- Irai, P., & Lu, A. (2018). Exploring the Relationship Among Psychological Safety, Knowledge Sharing, and Innovation. *ERN: Knowledge Management & Innovation (Topic)*. <https://doi.org/10.20474/jabs-4.3.1>
- Yaqoob, S., Sheraz, S., Mukhtar, M., & Nazir, S. (2024). The Role of Psychological Safety in Fostering Creativity and Innovation in the Workplace. *Review of Education, Administration & Law*. <https://doi.org/10.47067/real.v7i4.396>
- Wilfi, S., & E, L. (2025). A Qualitative Study On Exploring The Role Of Psychological Safety On Creativity And Innovation In Corporate Sector. *International Journal For Multidisciplinary Research*. <https://doi.org/10.36948/ijfmr.2025.v07i02.40726>
- Li, X., & Wareewanich, T. (2024). A Casual Model to Understand Psychological Safety Affecting Employee Creativity: Role of Knowledge Sharing, Knowledge Hiding and Organizational Safety Climate. *International Journal of Religion*. <https://doi.org/10.61707/eztzn198>

- Vallabh, P., Dhir, S., & Budhwar, P. (2024). Does psychological safety matter for innovative behaviour in hybrid workforce? The role of proactive personality, inclusive leadership and affective climate. *International Journal of Organizational Analysis*. <https://doi.org/10.1108/ijoa-08-2023-3920>
- Li, T., & Tang, N. (2022). Inclusive Leadership and Innovative Performance: A Multi-Level Mediation Model of Psychological Safety. *Frontiers in Psychology*, 13. <https://doi.org/10.3389/fpsyg.2022.934831>
- Sun, Y., & Huang, J. (2019). Psychological capital and innovative behavior: Mediating effect of psychological safety. *Social Behavior and Personality: an international journal*. <https://doi.org/10.2224/sbp.8204>
- Arumugam, V., Kumar, M., Kumar, M., & Rich, N. (2024). A curvilinear assessment of innovation in Six Sigma project teams: the influence of psychological safety and intrinsic motivation. *Journal of Manufacturing Technology Management*. <https://doi.org/10.1108/jmtm-12-2023-0569>
- Durrah, O. (2022). Do we need friendship in the workplace? The effect on innovative behavior and mediating role of psychological safety. *Current Psychology (New Brunswick, N.J.)*, 1 - 14. <https://doi.org/10.1007/s12144-022-03949-4>
- Liu, Y., Keller, R., & Bartlett, K. (2021). Initiative climate, psychological safety and knowledge sharing as predictors of team creativity: A multilevel study of research and development project teams. *Creativity and Innovation Management*. <https://doi.org/10.1111/CAIM.12438>
- Liu, L., Wan, Z., & Wang, L. (2023). Cross-level research on the impact of self-serving leadership on employee innovation behavior: The roles of workplace anxiety and team psychological safety. *Frontiers in Psychology*, 13. <https://doi.org/10.3389/fpsyg.2022.1069022>
- Zeb, A., Abdullah, N., Hussain, A., & Safi, A. (2019). Authentic leadership, knowledge sharing, and employees' creativity. *Management Research Review*, 43, 669-690. <https://doi.org/10.1108/mrr-04-2019-0164>
- Oeij, P., Hulsege, G., & Preenen, P. (2022). Organisational mindfulness as a sustainable driver of employee innovation adoption: Individual and organisational factors. *Safety Science*. <https://doi.org/10.1016/j.ssci.2022.105841>
- Zadow, A., Loh, M., Dollard, M., Mathisen, G., & Yantcheva, B. (2023). Psychosocial safety climate as a predictor of work engagement, creativity, innovation, and work performance: A case study of software engineers. *Frontiers in Psychology*, 14. <https://doi.org/10.3389/fpsyg.2023.1082283>
- Ali, A., Abbas, S., Khattak, M., Arfeen, M., Chaudhary, M., & Yousaf, L. (2022). Mediating role of employees' intrinsic motivation and psychological safety in the relationship between abusive supervision and innovative behavior: An empirical test in IT sector of Pakistan. *Cogent Business & Management*, 9. <https://doi.org/10.1080/23311975.2022.2039087>
- Ahmad, I., Gao, Y., Su, F., & Khan, M. (2021). Linking ethical leadership to followers' innovative work behavior in Pakistan: the vital roles of psychological safety and proactive personality. *European Journal of Innovation Management*. <https://doi.org/10.1108/ejim-11-2020-0464>
- Moake, T., Oh, N., & Steele, C. (2019). The importance of team psychological safety climate for enhancing younger team members' innovation-related behaviors in South Korea. *International Journal of Cross Cultural Management*, 19, 353 - 368. <https://doi.org/10.1177/1470595819887192>
