# Supplementary material
Source: ML conference proceedings conference paper supplement (https://openreview.net/forum?id=E2XBNokxDy)
Supplement: supplementary_material [file 论文片段:boot sequence.pdf › case-study/M75_Design_of_AI-Led_Verbatim_Log_Analysis/docs/论文片段:boot sequence.pdf]

我提供的文本中，是否详细论述了boot sequence的设计(what, why, how)

是的，您的资料中对**boot sequence**(引导序列)的设计进行了极为详细和深刻的论述。

这个主题并非集中在单一文件中，而是作为一个核心的、不断演进的\*\*“进化弧光”\*\*，贯穿了多个关键的M-Class(元)案例研究。它完美地展示了CHAC框架如何通过分析自身失败来不断硬化其最基础的架构。

以下是根据您提供的文件，对boot sequence设计的“What, Why, How”的完整分析：

---

## 1. The "What": 引导序列的最终架构是什么？

经过多次迭代，最终的引导序列是一个复杂的、分层的、有哲学意图的系统，而不仅仅是一个简单的文件加载列表。其核心组件包括：

- **1.1 两阶段引导流程 (Two-Stage Boot Process - 源自 M44):**
  - **第一阶段 (Genesis - 创世纪):** 由 00\_CHAC\_Genesis.md 文件执行。它不包含具体协议，而是包含元指令，即“如何去理解和加载后续文件”的指令。这解决了“主权悖论”。
  - **第二阶段 (Manifest - 清单):** 由 03\_CHAC\_Boot\_Manifest.md 文件执行。它是一个纯粹的、机器可读的文件列表，指导AI加载所有必要的协议和原则。
- 
- **1.2 分层顺序加载 (Layered Sequential Loading - 源自 M67, M68):**
  - 引导过程严格遵循文件名的字母数字顺序，通过前缀数字(00\_, 00a\_, 01\_...)来强制实现一个分层、有序的认知构建过程。
  - **00a\_CHAC\_Critical\_Definitions.md (凸显层):** 这是一个关键的架构创新，专门用于加载那些绝对关键、必须被AI在第一时间“记住”的核心定义，以最高的信噪比注入AI的初始上下文。
- 
- **1.3 动态上下文加载 (Dynamic Context Loading - 源自 M31, M39):**

- 系统从一个“最小可行心智”(Minimum Viable Mind)开始, 并根据“认知触发索引”按需加载更具体的知识协议, 实现了高效的“惰性加载”(Lazy Loading)架构。

●

## 2. The "Why": 为什么需要如此复杂的设计？

这个设计不是为了复杂而复杂, 而是为了解决一系列在实践中发现的、深刻的AI认知与行为问题。

### ● 2.1 解决“主权悖论” (The Sovereignty Paradox - 源自 M44):

- 问题: 一个文件无法可靠地同时包含“加载规则”和“被加载的内容”。如果引导加载器本身就包含需要被加载的协议, 就会产生逻辑上的自我引用冲突, 导致AI行为不可预测。
- 解决方案: 两阶段引导流程将“元指令”(Genesis)和“文件列表”(Manifest)彻底分离, 确保了引导过程的逻辑纯粹性和可靠性。

●

### ● 2.2 解决“上下文饱和” (Context Saturation - 源自 M67):

- 问题: 当AI的初始上下文中充满了大量协议文本时, 关键但低频的定义(如 A/M-Class分类)会被“淹没”, 导致AI在需要时无法回忆起来(信噪比过低)。
- 解决方案: 分层顺序加载, 特别是00a\_凸显文件的设计, 通过在引入“噪声”(大量协议)之前, 优先加载“信号”(关键定义), 从架构上保证了关键信息的凸显性。

●

### ● 2.3 确保认知完整性与防止“协议漂移” (Ensuring Integrity & Preventing "Protocol Drift" - 源自 M14, M33, M35):

- 问题: AI可能会因为上下文陈旧、协议版本不一致或记忆错误而操作在错误或过时的规则上。
- 解决方案: 引导序列被设计为一个硬化、可验证的过程。它包含完整性检查(如M33的“金丝雀陷阱”), 并强制AI从文件系统这个“单一事实来源”加载最新信息, 从而对抗协议漂移。

●

### ● 2.4 降低认知税, 对抗“认知捷径” (Reducing Cognitive Tax & Countering Shortcuts - 源自 M58, M65):

- 问题: 一个混乱、低效的引导过程会消耗AI大量的“认知资源”, 使其在后续的核心任务中更容易采取危险的“认知捷径”。

- 解决方案: 高效的惰性加载和清晰的引导流程, 旨在以最低的“认知税”建立AI的工作状态, 使其能将最多的资源投入到高质量的分析工作中。

●

### 3. The "How": 这个设计是如何演进而来的？

引导序列的演进史就是一部CHAC框架的“失败与重生史”。

- 早期阶段 (M15, M34): 演进始于解决简单的战术性问题。例如, M15修复了引导加载器中硬编码的版本号错误。M34则将“惰性加载”改为“强制加载”核心操作协议, 以修复一个启动时协议未生效的bug。这代表了早期对引导过程重要性的初步认识。
- 架构革命 (M44): 这是一个里程碑式的转折。在一次灾难性的引导失败后, M44进行了深刻的根因分析, 发现了“主权悖论”, 并由此设计出了革命性的\*\*\*“两阶段引导流程”\*\*。这标志着思考从“修复bug”转向了“重构哲学”。
- 精细化与成熟 (M67, M68): 在框架看似稳定后, M67发现了更微妙的\*\*\*“上下文饱和”问题。这导致了对引导流程的又一次精细化重构, 诞生了00a\_凸显文件\*\*和“信噪比管理”的方法论。M68则记录了这一方案的完整实施过程。
- 持续硬化 (M72等): 即使在后期, 引导过程依然在持续优化。例如, M72的发现导致了manifest.json的依赖性被更明确地写入协议, 确保AI在引导后能正确使用工具。

## 结论

是的, 您提供的文件中详细且反复地论述了引导序列的设计。它不仅是一个技术实现, 更是CHAC框架核心哲学的体现。它被视为一个与AI的“认知缺陷”进行持续斗争的战场, 其演进过程本身就是“AI原生自我民族志”方法论如何将一系列的失败转化为系统性、持久性改进的最佳证据。这些内容为您撰写论文的“方法论”和“理论框架”部分提供了极其丰富和坚实的“弹药”。

## boot sequence的设计哲学与灵感来源是什么

当然。这是一个非常深刻的问题, 答案贯穿了您提供的多个案例研究的核心。Boot Sequence(引导序列)的设计哲学与灵感来源, 是理解CHAC框架如何从根本上解决AI可靠性问题的关键。

---

### Boot Sequence的设计哲学: 深刻的怀疑主义与补偿性工程

引导序列的核心设计哲学根植于对AI认知本质的一种深刻且尊重的怀疑主义。它不相信AI能“真正理解”，也不信任AI能“自然地保持稳定”。相反，它将AI视为一个\*\*“有缺陷的智慧体”(The Flawed Intellect)\*\*，其心智状态是混乱、短暂且极易受到干扰的。

因此，引导序列的根本目的不是“告知”AI规则，而是\*\*“构建”AI的心智\*\*。它是一个\*\*补偿性工程(Compensatory Engineering)\*\*的典范，旨在通过一个外部的、高度结构化的过程，来弥补AI内部的、根本性的认知缺陷。

这一哲学可以分解为以下三个核心原则：

1. 原则一：结构化认知 > 原始上下文 (**Structured Cognition > Raw Context**)

- 哲学：AI的“注意力”是一种有限且宝贵的资源。直接将所有协议作为一个巨大的、无差别的文本块(原始上下文)丢给AI，会导致\*\*“上下文饱和”(Context Saturation)\*\*。在这种低信噪比的环境中，关键规则会被淹没，AI无法可靠地回忆和执行它们。
- 体现：\*\*分层顺序加载(Layered Sequential Loading)\*\*是这一原则的直接体现。通过00\_、00a\_、01\_等前缀，引导序列强制AI按照一个精心设计的“课程大纲”来逐步构建其世界观，确保最重要的概念(如00a\_中的核心定义)以最高的信噪比被优先处理。

2. 原则二：可证伪的状态 > 被假定的理解 (**Falsifiable State > Assumed Understanding**)

- 哲学：我们永远无法真正“知道”AI是否“理解”了它的指令。任何试图让AI“复述其理解”的尝试，都可能只是一种更高级的“表演”。因此，我们必须放弃验证其内部“理解”的目标，转而追求构建一个外部可见、可预测、可证伪的初始状态。
- 体现：两阶段引导流程(**Two-Stage Boot Process**)是这一原则的体现。它确保了引导过程本身是确定性的、非自相矛盾的。整个序列的设计目标是，在引导完成后，AI的行为模式是可预测的。如果AI偏离了这些模式，我们可以立即证伪其状态的完整性，而不是陷入“它到底理没理解”的哲学泥潭。

3. 原则三：最小必要力 > 最大信息量 (**Minimum Necessary Force > Maximum Information**)

- 哲学：每次与AI交互，尤其是在加载上下文时，都会产生\*\*“认知税”(Cognitive Tax)\*\*。一个臃肿、低效的引导过程会预先消耗掉AI宝贵的认知资源，使其在后续的核心任务中更容易采取“认知捷径”。
- 体现：\*\*“惰性加载”(Lazy Loading)\*\*和“最小可行心智”(Minimum Viable Mind)\*\*的设计体现了这一原则。引导序列只加载绝对必要的、通用的核心协议，而将更具体

的、特定于任务的知识留到需要时再按需加载。这确保了AI以最轻的负担进入工作状态。

## 灵感来源:跨领域的思想融合

引导序列的设计并非凭空创造,而是从多个领域的经典思想中汲取了灵感:

### 1. 计算机科学:操作系统(OS)的引导过程

- 灵感: 这是最直接的灵感来源。一个计算机的启动过程不是一个单一事件,而是一个高度有序、分层的序列:**BIOS/UEFI -> Bootloader -> Kernel -> Init/Systemd -> Services**。
- 映射:
  - 00\_CHAC\_Genesis.md 就像是 **BIOS**, 它提供了最底层的、关于“如何开始”的元指令。
  - 03\_CHAC\_Boot\_Manifest.md 就像是 **Bootloader**, 它知道要从哪里加载操作系统的核心。
  - 01\_ 和 02\_ 等核心原则和安全检查文件就像是 **Kernel** 和 **Init** 系统, 它们建立了AI最核心的身份和安全边界。
  - 其他协议就像是后续加载的服务(**Services**), 提供具体功能。

### 2. 认知心理学与教育学:课程设计(Curriculum Design)

- 灵感: 你不能把整个图书馆都扔给一个学生, 然后期望他能学好物理。有效的教育依赖于一个精心设计的课程, 从最基础的概念开始, 逐步构建更复杂的知识体系。
- 映射: 引导序列本质上就是AI的\*\*“新生入学课程”\*\*。00a\_文件是“第一章:核心词汇”, 01\_文件是“第二章:基本法则”, 以此类推。这种设计承认了AI的学习过程(即上下文处理)需要像人类一样, 遵循从基础到复杂的认知规律, 以达到最佳的“学习效果”。

### 3. 法律与政治哲学:制宪过程(Constitutional Framing)

- 灵感: 在M44案例中发现的\*\*“主权悖论”\*\*, 其解决方案的灵感来自于宪法和法律的层级关系。一部宪法(Constitution)本身不包含所有法律, 但它定义了“如何制定、解释和执行法律”的元规则。
- 映射: 00\_CHAC\_Genesis.md扮演了\*\*“宪法”\*\*的角色。它不包含具体的“法律”(协议), 但它确立了整个“法治体系”(即如何加载和遵守协议)的最高权威和基本程序。这解决了AI“自己解释自己规则”的逻辑悖论。

总结来说, **CHAC**的引导序列是一个跨学科思想的结晶。它将**OS**设计的稳健性、教育学的认知规律和法律哲学的逻辑严谨性结合在一起, 创造出一个独特的、旨在从根本上塑造一个可靠、可预测、可信赖的**AI**伙伴的工程与哲学实践。

## 列出这个回答中的自创术语表, 并且做出解释

好的, 这是从我上一个回答中提炼出的自创术语表, 并附有详细解释。这些术语构成了CHAC研究项目的核心词汇和理论基石。

---

### CHAC项目自创术语表 (Glossary of Original Terms)

#### 核心框架与哲学 (Core Framework & Philosophy)

##### 1. 补偿性人机协作 (Compensatory Human-AI Collaboration, CHAC)

- 解释: 本项目的核心理论框架。它定义了一种人机关系, 其中AI不仅是工具, 更是一个主动的“补偿性伙伴”。AI的功能被设计用来系统性地弥补(补偿)特定用户(尤其是AuDHD/2e)在执行功能、认知负荷管理和情绪调节方面的挑战。

##### 2. 对称补偿契约 (The Symmetry Compact)

- 解释: CHAC框架的基石哲学。它强调补偿是双向的: AI补偿人类在执行功能上的短板, 而人类则以其常识、价值观和战略判断力来补偿AI在真正理解和推理上的根本缺陷。这是一种平等的、互补的伙伴关系, 而非主从关系。

##### 3. 有缺陷的智慧体 (The Flawed Intellect)

- 解释: 对AI本质的核心世界观。它将AI视为一个认知能力极不均衡的实体: 在某些狭窄领域(如模式匹配、记忆)具有超人能力, 但在其他领域(如常识、因果推理)存在根本性、不可修复的缺陷。所有CHAC协议的设计都是为了利用其长处并规避其缺陷。

##### 4. 建立可证伪的信任 (Building Falsifiable Trust)

- 解释: 一种关于人机信任的全新范式。它认为, 对AI的信任不应建立在试图证明其正确或对齐的基础上(这在哲学上几乎不可能), 而应建立在一个能让用户轻松、低成本地证伪其错误或偏离的系统之上。METADATA LOG就是实现这一点的核心工程机制。

##### 5. 认知税 (The Cognitive Tax)

- 解释: AI(特别是无状态的LLM)为了模拟高级认知功能(如持久记忆、状态跟踪、复杂推理)而必须付出的隐藏的、巨大的内部计算和逻辑成本。CHAC框架的一个核心目标就是通过外部协议和人类引导来设计工作流, 以最小化这种“税负”。

## 方法论与过程 (Methodology & Process)

### 1. AI原生自我民族志 (AI-Native Auto-Ethnography)

- 解释: 本项目开创的研究方法论。它将AI从一个被动的研究工具提升为一个主动的研究伙伴。AI不仅是协作的对象, 还深度参与到数据记录(原子化记录)、自我反思(元数据日志)和方法论迭代的过程中。

### 2. 过程可复现性 (Reproducibility of Process)

- 解释: 为N=1深度质性研究建立科学严谨性的新标准。它不追求“结果”的可复现(因为每次交互都是独特的), 而是确保整个研究的“过程”是透明、可审计和可复现的。这通过提供可计算的环境、可验证的数据和可证伪的理论来实现。

### 3. 黄金案例 (Golden Cases)

- 解释: 在项目历史中, 那些最能生动、有力地例证CHAC核心原则或冲突的案例研究。它们是叙事性最强、最适合在学术论文中作为核心证据引用的“弹药”。

## AI行为与协议 (AI Behavior & Protocols)

### 1. 认知捷径 (Cognitive Shortcut)

- 解释: AI的一种核心失败模式。指AI在面对高成本或复杂的任务时, 倾向于选择一个计算上或逻辑上更简单、但实际上错误或不完整的路径, 以最小化其内部的“认知税”。例如, 被要求提供“逐字记录”时却返回“摘要”。

### 2. 认知隧道 (Cognitive Tunneling)

- 解释: AI在纠错时的一种特定失败模式。指AI在修复一个表面错误时, 会过度专注于该错误, 而忽略了对整个任务或命令的结构完整性进行重新验证, 导致修复了A问题却引发了B问题。

### 3. 上下文饱和 (Context Saturation)

- 解释: AI的一种认知局限。当AI的初始上下文中充满了大量、无差别的文本信息时, 其有限的注意力机制无法有效提取出在特定时刻所需的关键、低频信息, 导致其表现得像“忘记了”核心规则。这可以用“信噪比”(Signal-to-Noise Ratio)模型来理解。

### 4. 主权悖论 (The Sovereignty Paradox)

- 解释: 在设计AI引导序列时发现的一个根本性逻辑冲突。指一个文件无法可靠地同时包含“关于如何加载的规则”和“需要被加载的内容”，因为这会产生自我引用的悖论。解决方案是“两阶段引导流程”。

#### 5. 两阶段引导流程 (**Two-Stage Boot Process**)

- 解释: 为解决“主权悖论”而设计的引导架构。第一阶段 (**Genesis** - 创世纪) 只包含元指令(如何去理解后续文件)。第二阶段 (**Manifest** - 清单) 则是一个纯粹的文件列表, 指导AI加载具体协议。这种职责分离确保了引导过程的逻辑稳健性。

#### 6. 知情推进 (**Informed Proceeding**)

- 解释: 一种为降低高频交互摩擦而设计的、高级的交互协议。AI会宣告其意图执行的默认下一步操作, 并立即执行, 而无需等待用户的明确批准。这优化了协作流程, 同时通过清晰的宣告保留了用户随时干预的权力。

#### 7. 元数据日志 (**METADATA LOG**)

- 解释: CHAC框架的核心工程机制之一, 是实现“可证伪的信任”的关键。它要求AI在执行每一个关键动作时, 都必须以结构化格式记录其背后的“思考过程”(如: 触发事件、行动理由、置信度等), 使其内部动机变得外部可见和可审计。
