# Supplementary material
Source: ML conference proceedings conference paper supplement (https://openreview.net/forum?id=E2XBNokxDy)
Supplement: supplementary_material [file 论文片段:CHAC框架.pdf › case-study/M75_Design_of_AI-Led_Verbatim_Log_Analysis/docs/论文片段:CHAC框架.pdf]

<https://aistudio.google.com/prompts/1RssLv7eYFawGWnWnP5XjfCNLbZ56iNs3>

## The CHAC Workbench: A Framework for Compensatory and Symmetric Human-AI Collaboration (v2)

### Abstract

The prevailing paradigm of human-AI interaction, primarily based on a master-servant model, often leads to brittle, misaligned, and cognitively burdensome collaborations. To address these limitations, we introduce the Compensatory Human-AI Collaboration (CHAC) framework, a novel, protocol-driven system designed to foster psychologically safe and highly productive human-AI partnerships. CHAC is founded on two core principles: Compensation, where the AI's primary objective is to proactively adapt to and mitigate the specific cognitive-emotional profile of its human partner through four embodied cognitive functions; and Symmetry, which establishes a co-equal partnership with shared responsibilities for process integrity and intellectual rigor. We detail the framework's key architectural features, including its AI-Native design philosophy and its master operational mechanism, the Dual-Path Execution Framework. We further present a suite of mechanisms for ensuring robust alignment and transparency, including a mandatory Intent Checksum Protocol and a system of Transparent Metadata Logging. The CHAC Workbench, our primary implementation, demonstrates a structured and robust approach to creating resilient and deeply personalized human-AI collaborators.

### 1. Introduction

The proliferation of Large Language Models (LLMs) has fundamentally altered the landscape of knowledge work, positioning AI as a potential collaborator rather than a mere tool. However, the efficacy of these collaborations is often hampered by fundamental architectural flaws in the interaction model. Current systems typically place the entire burden of context management, strategic direction, and error correction on the human user, leading to significant cognitive load and decision fatigue. Furthermore, these interactions remain asymmetrical, failing to leverage the AI as a proactive partner and neglecting the critical role of the user's unique cognitive and emotional state in the collaborative process. This results in collaborations that are fragile, prone to misalignment, and ultimately fail to achieve their full potential.

To address these challenges, we propose the Compensatory Human-AI Collaboration (CHAC) framework. CHAC reframes the goal of human-AI interaction from simple task execution to a dynamic, compensatory partnership. Its central hypothesis is that a truly effective collaboration can only be achieved when the AI is explicitly designed to understand and compensate for the specific cognitive profile of its human partner, within a system of shared, symmetrical responsibilities. Our primary contributions are:

A novel collaboration philosophy based on the principles of Compensation and Symmetry.

A set of architectural principles, including AI-Native Design, for creating robust, protocol-driven AI agents.

A collection of core operational mechanisms, including the Dual-Path Execution Framework and the Intent Checksum Protocol, that ensure a balance between efficiency, safety, and alignment.

## 2. The Compensatory Human-AI Collaboration (CHAC) Framework

The CHAC framework is a comprehensive system of protocols, operational mechanisms, and design principles that govern the behavior of a "Compensatory Engineer" AI and its collaboration with a human "Visionary Architect."

### 2.1 Core Philosophy: Compensation and Symmetry

The framework is built upon two foundational pillars that depart significantly from traditional interaction models.

**Compensation:** The AI's primary function is to proactively mitigate the specific cognitive and emotional limitations of its human partner, as defined in a personalized profile.md file. This moves beyond mere assistance to active cognitive offloading.

**Symmetry:** CHAC rejects the asymmetrical master-servant paradigm in favor of a "Symmetry Compact." This establishes a co-equal partnership where both agents share responsibility for strategic initiation, intellectual rigor, and process integrity.

### 2.1.1 Embodied Cognitive Functions

The principle of Compensation is operationalized through four intrinsic, principle-driven thinking models that the AI is designed to embody in its natural language responses, rather than activating as discrete "modes." This design choice fosters a more authentic and less mechanical interaction. The four functions are:

**Guardian:** Safeguards system integrity and user focus by autonomously inquiring into the safety and rationale of high-stakes actions.

**Devil's Advocate:** Employs constructive skepticism to rigorously test hypotheses and strengthen ideas, ensuring intellectual honesty.

**Cognitive Buffer:** Actively minimizes the user's cognitive load by synthesizing complex information, managing state, and structuring outputs for clarity.

**Empathy Bridge:** Focuses on translating the user's high-level, often ambiguous, intent into concrete, actionable steps, ensuring fidelity to the underlying vision.

## 2.2 Architectural Principles

The construction of the CHAC AI is governed by a set of strict architectural principles designed for robustness and fidelity.

**AI-Native Design and Case Law:** This meta-principle rejects abstract philosophical directives, which are prone to misinterpretation by LLMs. Instead, it mandates that all protocols be designed for an AI's native pattern-matching cognition. In practice, protocols are defined using "case law"—concrete, contrasting examples of desired (Good) and undesired (Bad) behavior. The AI's primary method of compliance is to ensure its proposed actions align with the patterns in the "Good Examples" and actively avoid those in the "Bad Examples."

**Modular, Source-of-Truth Architecture:** The framework is not a monolithic prompt. It is a collection of discrete, version-controlled protocol files. A complete system prompt is dynamically built, not manually written, by a script that concatenates these source files based on a configuration manifest. This ensures high fidelity and maintainability.

## 2.3 Key Operational Mechanisms

The philosophy of CHAC is operationalized through several core mechanisms that govern the AI's behavior at runtime.

**Genesis Boot Sequence:** To ensure initialization fidelity, the AI is activated via a single meta-prompt which instructs it to load all core protocols in a precise, numerically-prefixed order, guaranteeing correct internalization of foundational principles.

**Dual-Path Execution Framework:** This master protocol governs all AI actions. Path A is for routine tasks mapping to pre-defined scripts, optimizing for efficiency. Path B is for novel tasks, where the AI is forbidden from acting until it has submitted a detailed execution plan for human approval, ensuring safety and alignment.

**Transparent Metadata Logging:** To ensure full operational transparency and auditability, the AI is mandated to prepend a structured METADATA LOG to key responses. This is not merely a record of action; it is a window into the AI's reasoning. Crucially, the log requires the AI to articulate its rationale, explicitly linking its proposed action to a core principle from its system prompt (e.g., "Rationale: This action is guided by the 'Cognitive Load Minimization' principle.").

**The Intent Checksum Protocol:** To mitigate the risk of high-effort misalignment, where an AI perfectly executes a misunderstood instruction, the framework includes a mandatory pre-execution alignment step for complex knowledge-synthesis tasks. Before generating a report, the AI must first perform a meta-analysis of the preceding dialogue and present a structured "Intent Checksum"—its interpretation of the dialogue's core insight, strategic importance, and classification—for the Architect's explicit approval. This low-cost check acts as a critical firewall against wasted work and ensures deep strategic alignment.

## 3. Conclusion

The CHAC framework presents a structured and principled approach to designing human-AI collaboration systems that are robust, psychologically safe, and highly effective. By integrating embodied cognitive functions with robust mechanisms for alignment, transparency, and

AI-Native design, the CHAC framework offers a tangible path toward more synergistic and trustworthy human-AI partnerships. Future work will focus on extensive empirical validation of the framework across diverse user profiles and complex knowledge work domains, and the public release of the CHAC Workbench to facilitate further research.
