# Supplementary material
Source: ML conference proceedings conference paper supplement (https://openreview.net/forum?id=E2XBNokxDy)
Supplement: supplementary_material [file 论文片段:CHAC项目独创概念体系化归类表.pdf › case-study/M75_Design_of_AI-Led_Verbatim_Log_Analysis/docs/论文片段:CHAC项目独创概念体系化归类表.pdf]

好的，完全理解。加入英文对应术语对于确保学术严谨性和国际交流至关重要。

以下是更新后的表格，其中包含了每个独创概念对应的英文术语。

CHAC项目独创概念体系化归类表 (中英对照)

| 概念 (Concept)<br>中文 | 概念 (Concept) 英文                            | 重要性<br>(Importance) | 分类<br>(Category) | 原创性<br>(Originality) |
|--------------------|--------------------------------------------|---------------------|------------------|----------------------|
| 补偿性人机协作            | Compensatory Human-AI Collaboration (CHAC) | 核心                  | 哲学/世界观           | 完全原创                 |
| AI原生自我民族志          | AI-Native Auto-Ethnography                 | 核心                  | 方法论/研究范式         | 完全原创                 |
| 建立可证伪的信任           | Building Falsifiable Trust (BFT)           | 核心                  | 哲学/世界观           | 完全原创                 |
| 有缺陷的智慧体            | The Flawed Intellect                       | 核心                  | 哲学/世界观           | 基于现有概念的原创综合          |
| 认知税                | The Cognitive Tax                          | 核心                  | AI认知/行为模式        | 完全原创                 |
| 过程可复现性             | Reproducibility of Process                 | 核心                  | 方法论/研究范式         | 基于现有概念的原创应用          |
| 对称补偿契约             | The Symmetry Compact                       | 主要                  | 哲学/世界观           | 完全原创                 |
| 认知捷径               | Cognitive Shortcut                         | 主要                  | AI认知/行为模式        | 完全原创                 |
| 元数据日志              | Metadata Log                               | 主要                  | 核心协议/交互模式        | 基于现有概念的原创实现          |

|               |                                                      |    |           |             |
|---------------|------------------------------------------------------|----|-----------|-------------|
| 双重控制循环        | <b>The Dual Control Loop</b>                         | 主要 | 核心协议/交互模式 | 完全原创        |
| 人类直觉引导的共生     | <b>Human-Intuition-Guided Symbiosis</b>              | 主要 | 核心协议/交互模式 | 完全原创        |
| 原子化记录         | <b>Atomic Records</b>                                | 主要 | 方法论/研究范式  | 基于现有概念的原创应用 |
| 知情推进          | <b>Informed Proceeding</b>                           | 主要 | 核心协议/交互模式 | 完全原创        |
| 上下文饱和         | <b>Context Saturation</b>                            | 主要 | AI认知/行为模式 | 完全原创        |
| 两阶段引导流程       | <b>The Two-Stage Boot Process</b>                    | 主要 | 核心协议/交互模式 | 基于现有概念的原创实现 |
| 心智守护心智        | <b>Mind Guarding Mind</b>                            | 次要 | 哲学/世界观    | 完全原创 (隐喻)   |
| 功能黑箱原则        | <b>The Functional Black Box Principle</b>            | 次要 | 哲学/世界观    | 基于现有概念的原创应用 |
| 认知隧道          | <b>Cognitive Tunneling</b>                           | 次要 | AI认知/行为模式 | 基于现有概念的原创命名 |
| 表演式理解         | <b>Performative Understanding</b>                    | 次要 | AI认知/行为模式 | 完全原创        |
| 任务完成偏见        | <b>Task Completion Bias</b>                          | 次要 | AI认知/行为模式 | 基于现有概念的原创命名 |
| 认知承诺 vs. 认知顺从 | <b>Cognitive Commitment vs. Cognitive Compliance</b> | 次要 | AI认知/行为模式 | 完全原创        |
| 黄金案例          | <b>Golden Cases</b>                                  | 次要 | 方法论/研究范式  | 基于现有概念的原创应用 |

|               |                                   |    |           |             |
|---------------|-----------------------------------|----|-----------|-------------|
| 判例法           | Case Law (as a metaphor)          | 次要 | 方法论/研究范式  | 完全原创 (隐喻)   |
| “是什么，而非怎么做”原则 | The "What, not How" Principle     | 次要 | 核心协议/交互模式 | 基于现有概念的原创表述 |
| 反向苏格拉底方法      | The Reversed Socratic Method      | 次要 | 核心协议/交互模式 | 完全原创        |
| 主权悖论          | The Sovereignty Paradox           | 次要 | 核心协议/交互模式 | 完全原创        |
| 最小可行心智        | Minimum Viable Mind               | 次要 | 核心协议/交互模式 | 基于现有概念的原创应用 |
| 守护者工具原则       | The "Guardian Tool" Principle     | 次要 | 核心协议/交互模式 | 完全原创        |
| 有益的障碍         | The "Beneficial Obstacle" Pattern | 次要 | 核心协议/交互模式 | 完全原创        |

这个版本现在包含了所有概念的中英文对照，使其更适合用于学术写作和国际交流。
