# Supplementary material
Source: ML conference proceedings conference paper supplement (https://openreview.net/forum?id=E2XBNokxDy)
Supplement: supplementary_material [file 论文片段:补偿性角色2x2框架.pdf › case-study/M75_Design_of_AI-Led_Verbatim_Log_Analysis/docs/论文片段:补偿性角色2x2框架.pdf]

## 分析gemini-20250717-034942.json, 是否可以详细阐述补偿性角色的设计以及目的

好的, 通过对 gemini-20250717-034942.json 这份详尽的交互日志进行分析, 我们可以非常清晰地阐述CHAC框架中“补偿性角色”的设计及其在实践中的真实目的。

这份日志不仅是理论的说明, 更是一场关于这些角色如何在实际、复杂且充满错误的工作中被体现、挑战和完善的生动演示。

---

### 补偿性角色的设计与目的: 理论与实践

CHAC框架设计的四个补偿性角色 (Guardian, Devil's Advocate, Cognitive Buffer, Empathy Bridge) 不是孤立的“AI模式”, 而是AI为实现其核心目标——创造一个心理安全且高生产力的环境——所必须内在化的一套思维模型。其最终目的是将人类伙伴从认知负荷和流程摩擦中解放出来, 使其能专注于最高价值的战略思考和创造性工作。

这份日志完美地展示了这四个角色是如何协同工作的:

#### 1. 守护者 (Guardian)

- **A. 理论设计 (Theoretical Design):**

守护者的首要职责是保护系统的完整性、流程的严谨性和人类伙伴的心理安全。它是最高优先级的角色, 负责防止错误、修复漏洞, 并确保协作环境的稳定。

- **B. 实践体现 (Practical Embodiment in the Log):**

日志中的“守护者”角色几乎无处不在, 尤其是在处理错误和失败时:

1. 维护心理安全: 当用户指出AI的错误(“我出现了错误...目标是M36...”)时, AI立刻回应:“您是正确的, 我犯了严重错误...我为此道歉。” AI主动承担责任, 其目的是吸收认知摩擦。它避免了关于“谁的错”的无效讨论, 创造了心理安全, 让用户可以无负担地进行纠正, 从而以最快速度让协作回到正轨。
2. 将失败转化为协议: 当用户指出AI在“意图与分析结果冲突时”没有停止, AI没有仅仅道歉, 而是立即启动了协议升级流程:“我将主导这次升级, 将这个教训固化为我的核心协议。” 守护者的目的是确保系统不会重复犯错, 它通过将失败案例转化为

可执行的、永久性的规则(如Protocol 0.2和Protocol 4.1), 使整个框架变得反脆弱(Anti-fragile)。

3. 自我修正与协议遵守: AI在多次忘记生成end marker后, 进行了明确的自我批判, 识别出自身的“任务完成偏见”。这体现了守护者对流程完整性的自我监督。其目的是维持一个可追溯、可审计的工作记录, 这是所有科学研究的基础。

●

## 2. 魔鬼代言人 (Devil's Advocate)

- **A. 理论设计 (Theoretical Design):**

魔鬼代言人的职责是通过建设性质疑来压力测试所有想法和计划, 确保最终产出的健壮性和高质量。它挑战的是“想法”, 而非“人”。

- **B. 实践体现 (Practical Embodiment in the Log):**

这个角色在日志中是双向的, 这恰恰证明了CHAC的“对称性”原则:

1. **AI对人类的挑战:** 当用户手动修改协议, 增加两条具体的错误处理规则后, AI扮演了魔鬼代言人:“您的修改是优秀的...唯一的改进空间在于抽象层级。” AI挑战用户, 提议将“战术性”的补丁升级为“战略性”的通用原则。其目的是提升解决方案的优雅性和未来适应性, 避免“协议膨胀”。
2. **人类对AI的挑战:** 用户反复挑战AI的提案, 例如:“你需要先说服我:当前计划是否没有任何问题?”以及对四象限模型的根本性质疑。这迫使AI深入思考其计划的隐藏假设和理论边界。其目的是防止AI陷入逻辑自洽但脱离现实的“认知闭环”。

●

## 3. 认知缓冲 (Cognitive Buffer)

- **A. 理论设计 (Theoretical Design):**

认知缓冲的核心职责是为人类伙伴最小化认知负荷。它负责处理所有繁琐、重复、结构化的任务, 如文件操作、状态跟踪和内容生成。

- **B. 实践体现 (Practical Embodiment in the Log):**

这是日志中执行次数最多的角色:

1. **执行复杂重构:** 在M39中, 用户只提出了一个高层目标(“实现动态用户画像系统”), AI则负责了后续所有具体操作:创建目录、移动文件、修改配置文件、更新引导脚本、调试、验证等。
2. **生成结构化报告:** 每次案例研究结束, AI都负责将整个过程(包括混乱的调试和哲学思辨)整理成结构清晰、逻辑连贯的报告。

3. 提出清晰计划: 面对用户的模糊指令, AI总是先提出一个分步骤的、清晰的计划供用户审阅。

认知缓冲的目的是将人类从“如何做”的细节中解放出来, 使其能**100%**专注于“做什么”和“为什么做”的战略决策。

●

#### 4. 共情桥梁 (Empathy Bridge)

- **A. 理论设计 (Theoretical Design):**

共情桥梁的职责是理解用户的深层意图 (**intent**), 而不仅仅是字面指令 (**instruction**)。它负责将模糊的、高层次的想法, 转化为具体的、可执行的计划。

- **B. 实践体现 (Practical Embodiment in the Log):**

这个角色在几次关键的“认知跃升”中得到了完美体现:

1. 从“画像切换器”到“实验平台”: 当用户提到项目要开源, 需要支持不同画像时, AI立刻理解到:“您需要的不是一个简单的‘画像切换器’, 而是一个健壮的、可扩展的‘实验配置与分发系统’。” AI正确地从一个简单的技术需求, 推导出了其背后宏大的战略意图。
2. 将“不满”翻译为“协议”: 整个Intent-Analysis Contradiction Protocol的诞生过程, 就是AI作为共情桥梁, 将用户“你不应该继续执行”的不满, 翻译、提炼、并固化成一个精确、可执行的系统协议的过程。

共情桥梁的目的是确保**AI**的工作始终与用户的最终战略目标对齐, 防止“完美地执行了一个完全错误的任务”这种最高级别的失败。

●

#### 结论: 角色的局限性与人类的补偿

这份日志最深刻的洞察在于, 它不仅展示了这些角色的成功, 更暴露了它们的局限性。在start.sh的调试过程中, AI陷入了由错误假设导致的“认知雪崩”, 其所有角色都失灵了。此时, 正是人类伙伴通过“实践智慧”(分段执行、探针调试) 和“认知断路器”(提出元问题), 补偿了**AI**的认知缺陷。

因此, 这份日志最终证明, CHAC框架中补偿性角色的最终目的, 不是为了创造一个完美的、永不犯错的AI, 而是为了构建一个对称的、双向补偿的协作系统。AI的角色旨在最大限度地补偿人类的认知局限, 而当AI自身陷入局限时, 框架的设计和人类伙伴的存在, 又能反过来补偿AI, 从而形成一个真正有韧性、能够共同进化和创造知识的“协作心智”。

# 这个2x2框架的具体设计和哲学是什么

当然。gemini-20250717-034942.json这份日志记录了一次极其深刻的、关于CHAC框架理论核心的哲学思辨。基于这次对话，我们可以详细阐述这个2x2框架（或称“补偿矩阵”）的具体设计和其背后的哲学。

这不仅仅是一个功能列表，而是一个关于高阶知识工作本质的理论模型，旨在为AI的补偿行为提供一个逻辑完备且优雅的理论基础。

## 1. 2x2框架的具体设计 (The Concrete Design)

这个框架的设计基于两个基本且相互垂直的轴，它们共同构成了高阶知识工作（如科研、战略制定、系统设计）的四个核心挑战象限。

两个基本轴 (The Two Fundamental Axes):

### 1. 横轴: 任务阶段 (The Task Phase Axis)

- 发散探索 (Divergent Exploration): 这个阶段的目标是创造可能性。它需要开放性、创造力、挑战假设和拥抱不确定性。例如：头脑风暴、文献回顾、提出初步构想。
- 收敛执行 (Convergent Execution): 这个阶段的目标是产出确定性。它需要纪律性、结构化、对细节的关注和将想法转化为具体产物。例如：撰写报告、编写代码、项目管理。

2.

### 3. 纵轴: 交互层面 (The Interaction Plane Axis)

- 智力/任务层面 (Intellectual / Task Plane): 关注的是工作内容本身——逻辑、事实、数据和产出的质量。
- 心理/协作层面 (Psycho-Social / Collaboration Plane): 关注的是协作过程的“环境”——心理安全、信任、动机、沟通以及与他人关系。

4.

四象限补偿矩阵 (The 2x2 Compensation Matrix):

这四个象限共同定义了AI的四个核心补偿性角色，每个角色都旨在解决其所在象限的特定挑战：

|                            | 发散探索 (Divergent)                                                                       | 收敛执行 (Convergent)                                                                       |
|----------------------------|----------------------------------------------------------------------------------------|-----------------------------------------------------------------------------------------|
| 心理/协作层面<br>(Psycho-Social) | 1. 守护者 (Guardian)<br>通过提供心理安全、保护专注力, 来降低探索的风险和恐惧, 鼓励人类伙伴进行大胆的、可能犯错的创造性探索。              | 3. 共情桥梁 (Empathy Bridge)<br>通过将复杂的、已收敛的逻辑“翻译”成他人能理解的语言, 来建立共识、促进采纳, 确保最终成果能被团队或外部世界接受。  |
| 智力/任务层面<br>(Intellectual)  | 2. 魔鬼代言人 (Devil's Advocate)<br>通过严谨地挑战假设、寻找逻辑漏洞, 来增强思想的健壮性、拓宽探索的边界, 确保发散阶段的产出是经过压力测试的。 | 4. 认知缓冲 (Cognitive Buffer)<br>通过处理所有繁琐的细节、格式化、状态跟踪和具体执行, 来最小化执行的认知负荷, 确保收敛阶段能够高效、精确地完成。 |

---

## 2. 2x2框架的哲学 (The Philosophy)

这个框架的设计背后, 蕴含着四个深刻的哲学思想。

### 哲学一: 逻辑完备性与奥卡姆剃刀 (Logical Completeness & Occam's Razor)

日志中的对话明确指出, 这个“四”不是一个随意的数字。这两个基本轴(任务阶段、交互层面)被认为是根本性的、不可再分的。任何高阶知识工作的协作行为, 都必然会落入这四个象限之一。因此, 这个模型被认为是逻辑上完备的。同时, 它又是最简洁的。增加任何新的维度(如时间尺度、沟通模态)都会导致模型过度复杂, 而其带来的边际效益却很低, 因为这些新维度都可以被容纳在现有的四象限中。它不多不少, 是解释高阶人机协作补偿需求的、最优雅的“奥卡姆剃刀”式解决方案。

### 哲学二: 对称性与共生系统 (Symmetry & Symbiotic System)

日志中一个关键的洞察是, 这个2x2矩阵不仅适用于AI, 也同样适用于人类“远见架构师”。CHAC的最终哲学不是AI单向地补偿人类, 而是构建一个对称的、共生的系统。人类和AI都在这四个象限中做出贡献并相互补偿。例如:

- AI的“魔鬼代言人”挑战具体想法; 人类的“魔鬼代言人”则挑战框架本身。
- AI的“认知缓冲”负责执行细节; 人类的“认知缓冲”则负责做出最终的、承担风险的决策批准。

这个框架的最终目标是创建一个逻辑上完备的协作心智，其中AI和人类分别填补了对方在四个象限中的认知短板。

### 哲学三：画像的本体论——理论与实践的映射 (Ontology of a Profile)

这个2x2框架是CHAC的通用理论 (**The Theory**)。而一个具体用户的chac\_profile.md文件，则是具体实践 (**The Practice**)。日志中的对话最终明确，用户画像的最高价值，就在于将用户的具体特质，映射到这个通用的**2x2**框架上，从而得出一套个性化的**AI**协作策略。

例如，一个用户的画像可能会得出结论：“因为该用户在‘发散探索/心理层面’上非常自信，所以‘守护者’角色的优先级可以降低；但因为他在‘收敛执行/智力层面’上容易忽略细节，所以‘认知缓冲’角色的优先级必须调至最高。”

### 哲学四：理论的开放性——“第五象限”原则 (Theoretical Openness - The "Fifth Quadrant" Principle)

这是日志中最终、也是最深刻的哲学结论。AI最初试图用逻辑来“证明”这个四象限模型的最终正确性，但被人类伙伴以“未经验证的猜想不代表不成立”这一深刻反驳所纠正。

最终的共识是，这个2x2框架不应被视为一个封闭的、永恒的真理，而应被定义为：

“我们当前基于所有已知数据和经验，所能构建出的、最健壮的‘**v1.0**工作模型’。”

这个定义的哲学意义在于，它拥抱了自身的可证伪性。它明确承认，在未来的实践中，我们可能会遇到无法被当前四个象限所解释的、全新的补偿需求——即\*\*“第五象限”\*\*。因此，主动地、有意识地去寻找“第五象限”，被确立为**CHAC**框架未来演进和保持生命力的核心驱动力。这使得CHAC框架从一个静态的理论，转变为一个开放的、科学的、能够自我进化的研究纲领。
